1  
2  
3  
4  
5  
6  
7  
8  
9  
10  
11  
12  
13  
14  
15  
16  
17

**- Review -**

**The epidemiology of human *Taenia solium* infections: a  
systematic review of the distribution in Eastern and  
Southern Africa.**

Short title: Epidemiology of human *T. solium* infections in Eastern and  
Southern

Gideon Zulu<sup>1,2\*</sup>, Dominik Stelzle<sup>3</sup>, Kabemba E. Mwape<sup>2</sup>, Tamara M. Welte<sup>4,5</sup>, Hilde  
Strømme<sup>6</sup>, Chishimba Mubanga<sup>2</sup>, Wilbroad Mutale<sup>7</sup>, Annette Abraham<sup>3,8</sup>, Alex  
Hachangu<sup>2</sup>, Veronika Schmidt<sup>3,8</sup>, Chummy. S. Sikasunge<sup>9</sup>, Isaac. K. Phiri<sup>2&</sup> and  
Andrea S. Winkler<sup>3,8&</sup>

<sup>1</sup> Department of Clinical Studies, School of Veterinary Medicine, University of Zambia, Lusaka,  
Zambia

<sup>2</sup> Ministry of Health, Government of the Republic of Zambia

<sup>3</sup> Center for Global Health, Department of Neurology, Klinikum rechts der Isar, Technical  
University Munich, Munich, Germany

<sup>4</sup> Department of Neurology, Center for Global Health, Faculty of Medicine, Technical University  
of Munich, Munich, Germany.

18 <sup>5</sup> Epilepsy Center, Department of Neurology, University Hospital Erlangen, Germany.

19 <sup>6</sup> University of Oslo, University Library, Medical Library, Norway

20 <sup>7</sup> School of Public Health, University of Zambia, Lusaka, Zambia

21 <sup>8</sup> Centre for Global Health, Institute of Health and Society, University of Oslo, Oslo, Norway

22 <sup>9</sup> Department of Para-clinical studies, School of Veterinary Medicine, University of Zambia,  
23 Lusaka, Zambia

24 \* Corresponding author

25 Email: [gideonzulu@yahoo.com](mailto:gideonzulu@yahoo.com) (GZ)

26 & These authors contributed equally to this work.

## 27 Abstract

28 **Background:** *Taenia solium* is a tapeworm that causes taeniosis in humans and cysticercosis in  
29 humans and pigs. Within Eastern and Southern Africa (ESA), there are many countries in which  
30 information on the presence of human taeniosis and cysticercosis is missing. This systematic  
31 review aimed to describe the current information available and gaps in the epidemiology of human  
32 *T. solium* infections in ESA.

33 **Methods/Principle Findings:** Scientific literature published between 1<sup>st</sup> January 2000 and 20<sup>th</sup>  
34 June 2022 in international databases [MEDLINE (Ovid), Embase (Ovid), Global Health (Ovid),  
35 Scopus (Elsevier), African Index Medicus (via WHO Global Index Medicus), and Open Grey] was  
36 systematically reviewed for ESA following the PRISMA approach. The study area included 27

37 countries that make up the ESA region. Information on either taeniosis, cysticercosis or NCC was  
38 available for 16 of 27 countries within the region. Most case reports for cysticercosis and NCC  
39 were from South Africa, while Tanzania had the most aggregated cysticercosis reports. Eleven  
40 countries reported on NCC with seven countries reporting data on NCC and epilepsy. Unconfirmed  
41 human *T. solium* taeniosis cases were reported in nine countries while two countries (Madagascar  
42 and Zambia) reported confirmed *T. solium* cases. The cysticercosis seroprevalence ranged between  
43 0.99 - 40.8% on antigen (Ag) tests and between 1.7 - 45.3% on antibody (Ab) tests, while NCC-  
44 suggestive lesions on brain CT scans showed a prevalence range between 1.0 - 76%. The human  
45 taeniosis prevalence based on microscopy ranged between 0.1 - 14.7%. Based on Copro Ag-  
46 ELISA studies conducted in Kenya, Rwanda, Tanzania, and Zambia, the highest prevalence of  
47 19.7% was reported in Kenya

48 **Conclusions:** Despite the public health and economic impact of *T. solium* in ESA, there are still  
49 large gaps in knowledge about the occurrence of the parasite, and the resulting One Health disease  
50 complex, and monitoring of *T. solium* taeniosis and cysticercosis is mostly not in place

## 51 Author summary

52 *Taenia solium* is a tapeworm that causes three diseases, taeniosis in humans and cysticercosis in  
53 humans and pigs. Neurocysticercosis, which occurs when the central nervous system is involved  
54 has been associated with up to 57% of epilepsy cases in sub-Saharan Africa. Diagnosing  
55 neurocysticercosis among people with epilepsy is vital to prevent further morbidity and mortality  
56 from the disease as well as to reduce the negative socio-cultural beliefs associated with epilepsy.  
57 Within Eastern and Southern Africa, there are many countries in which information on the  
58 presence of human taeniosis, cysticercosis and neurocysticercosis is missing. This systematic

59 review aimed to describe the current information available and gaps in the epidemiology of human  
60 *T. solium* infections in Eastern and Southern Africa. We found that Information on either taeniosis,  
61 cysticercosis or NCC was available only for 16 of 27 countries within the region. We also found  
62 that most of the studies on *T. solium* taeniosis, cysticercosis and neurocysticercosis within the  
63 region have been done in Kenya, Madagascar, Mozambique, Rwanda, South Africa, Tanzania and  
64 Zambia. Understanding the epidemiology of *T. solium* infections is essential for monitoring,  
65 prevention and control of the disease complex in a One Health approach.

## 66 **Introduction**

### 67 **Rationale**

68 *Taenia solium* is a tapeworm that causes taeniosis in humans and cysticercosis in humans and pigs.  
69 The life cycle of *T. solium* involves pigs as intermediate hosts (cysticercosis) while humans are  
70 definitive hosts (taeniosis). Humans may also act as accidental intermediate hosts when larvae of  
71 the parasite settle in muscles, subcutaneous or organ tissues causing human cysticercosis (HC). If  
72 they lodge in the central nervous system (CNS), including the brain and the spinal cord, the disease  
73 is called neurocysticercosis (NCC) [1,2]. An individual may also have cysticerci in the CNS as  
74 well as in other parts of the body, which is referred to as (neuro) cysticercosis. NCC may be  
75 asymptomatic, but it can also cause various neurological signs/symptoms such as epileptic seizures  
76 and epilepsy, chronic progressive headache, focal neurological deficits, signs and symptoms of  
77 increased intracranial pressure and in rare cases, death [3–5]. Globally, NCC is estimated to be  
78 responsible for 30% of cases of acquired epilepsy in endemic areas [6] and 22% in sub-Saharan

79 Africa [7]. However, this proportion depends on the infection pressure of *T. solium* and thus may  
80 vary considerably.

81 *T. solium* is common in Asia and Latin America, especially in areas where pigs are reared under  
82 free-ranging conditions, where pork is eaten and where hygiene is limited [8,9]. Hence, *T. solium*  
83 is also likely endemic in most African countries [10]. Nevertheless, information on the endemicity  
84 of *T. solium* is limited and there are many countries from which no published information is  
85 available for either human or porcine cysticercosis. The purpose of this review was to gather all  
86 published information on human *T. solium* infections (*T. solium* taeniosis/(neuro)cysticercosis  
87 (TSTC)) in eastern and southern Africa (ESA) within the period 1st January 2000 and 20th June  
88 2022 and describe the gaps in the epidemiology of TSTC in this area.

## 89 **Methods**

90 The systematic review was conducted following the Preferred Reporting Items for Systematic  
91 Reviews and Meta-Analyses (PRISMA) guidelines [11] (S1 Table). The review was registered  
92 with the International Prospective Register of Systematic Reviews (PROSPERO) (registration  
93 number: CRD 42022343072).

## 94 **Search strategy**

95 All published articles were searched using the electronic databases, MEDLINE (Ovid), Embase  
96 (Ovid), Global Health (Ovid), Scopus (Elsevier), African Index Medicus (via WHO Global Index  
97 Medicus), and Open Grey. The reference lists of included studies were also scanned to identify  
98 further eligible documents. The searches were conducted on 20<sup>th</sup> June 2022.

99 For all questions subject headings (where applicable) and text words describing *T. solium*  
100 taeniosis/cysticercosis/neurocysticercosis and prevalence, epidemiology, control, elimination, or  
101 eradication were searched. The search strategy was intended to obtain all available literature on  
102 human taeniosis, cysticercosis and neurocysticercosis in ESA conducted and published in the last  
103 22 years. Grey literature was also searched for any relevant publications. The search terms for all  
104 databases can be found in (S1 File).

## 105 **Procedures**

### 106 **Data management**

107 Literature search results were uploaded to the bibliographic software Mendeley Desktop and  
108 Covidence. Duplicates were removed based on author names and titles. Screening questions based  
109 on the inclusion and exclusion criteria were developed and citation abstracts and full-text articles  
110 were uploaded.

### 111 **Selection process**

112 The selection process was conducted in two stages. Firstly, titles and abstracts were screened  
113 independently by two reviewers (GZ and CM) and then full-text reports were obtained by the same  
114 reviewers for a detailed assessment with respect to the inclusion criteria. For records that referred  
115 to the same study, only one was selected.

## 116 **Data collection process**

117 The data were collected using standardized data collection forms in Microsoft Excel (S2 File).  
118 Data extracted included demographic information, methodology, and all the relevant reported  
119 outcomes. GZ carried out the data extraction with verification by CM.

## 120 **Data items**

121 Predefined tables summarizing individual cases included the year of diagnosis, age, gender, the  
122 country where cases were detected, diagnostic method, and location of the lesion (for  
123 cysticercosis). Tables summarizing aggregated cases or prevalence data included country, level of  
124 data collection (e.g. national or regional), timeframe, number of cases (or prevalence proportion),  
125 number of people tested, and diagnostic method.

## 126 **Eligibility criteria**

### 127 **Inclusion criteria**

128 We included all studies describing human TSTC in ESA, which was defined as the area covered  
129 by the following countries/territories: Angola, Botswana, Burundi, Comoros, Djibouti, Eritrea,  
130 Ethiopia, Kenya, Lesotho, Madagascar, Malawi, Mauritius, Mayotte, Mozambique, Namibia,  
131 Reunion, Rwanda, Seychelles, Socotra, Somalia, Somaliland, South Africa, Eswatini (former  
132 Kingdom of Swaziland), Tanzania, Uganda, Zambia and Zimbabwe. Included in this review were  
133 studies that describe the epidemiology, disease occurrence, burden, prevalence, incidence,  
134 prevention and control of TSTC in any of the twenty-seven countries of ESA. All observational  
135 studies including case series and case reports and systematic reviews of such studies were included.

136 Only studies conducted between 1<sup>st</sup> January 2000 and 20<sup>th</sup> June 2022 were considered. No  
137 language limits were imposed on the search, although studies in languages other than English were  
138 only included if they could be adequately translated by using Google Translate.

139

## 140 **Exclusion criteria**

141 We excluded studies that did not concern *T. solium*, did not concern humans, did not report data  
142 from within ESA and studies conducted before 1<sup>st</sup> January 2000.

## 143 **Risk of bias assessment**

144 The risk of bias in the studies was assessed using items recommended by the Agency for Health  
145 Care Research and Quality (AHRQ) [12]. This assessment covered baseline characteristics,  
146 inclusion-exclusion criteria, confounding and modifying variables, performance bias, attrition  
147 bias, detection bias and reporting bias. Each of these factors was rated and categorized as low, or  
148 high risk of bias. If the information available was insufficient, the risk of bias was considered  
149 'unsure'.

## 150 **Statistical analyses**

151 No statistical pooling of results was conducted and the findings of the review are presented in a  
152 narrative synthesis with tables and figures to aid data presentation. Prevalence data if not already  
153 provided were calculated using the numerator and denominator of the study sample. Data were  
154 analyzed separately for taeniosis, cysticercosis, and neurocysticercosis. For the latter two, data  
155 were also presented separately for the general population and people with epilepsy.



## 156 **Ethical considerations**

157 Ethical recommendation was not required for this review.

## 158 **Results**

### 159 **Study selection**

160 Our search yielded 2114 records of which 1198 were duplicates. Through screening of titles and  
161 abstracts, 776 (85%) records were excluded and for a further 8, no full text was found. Full-text  
162 assessment with respect to the inclusion criteria was performed on 132 records of which 19 (14%)  
163 were excluded (17 reported data described in other included studies, one did not concern *T. solium*,  
164 and one reported results outside the scope of the study). One hundred and thirteen (113) studies  
165 were finally included in the review. Of those, 49 were concerned with only (neuro) cysticercosis,  
166 57 with taeniosis, and 7 with both cysticercosis and taeniosis. Of the 113 reports reviewed, 25 were  
167 case reports, 82 were cross-sectional, 3 cohort and 3 case-control studies. The flow diagram for  
168 the search is shown in (Fig 1). The reference for included studies is shown in (S2 Table).

169

170

171

172

173

174

175

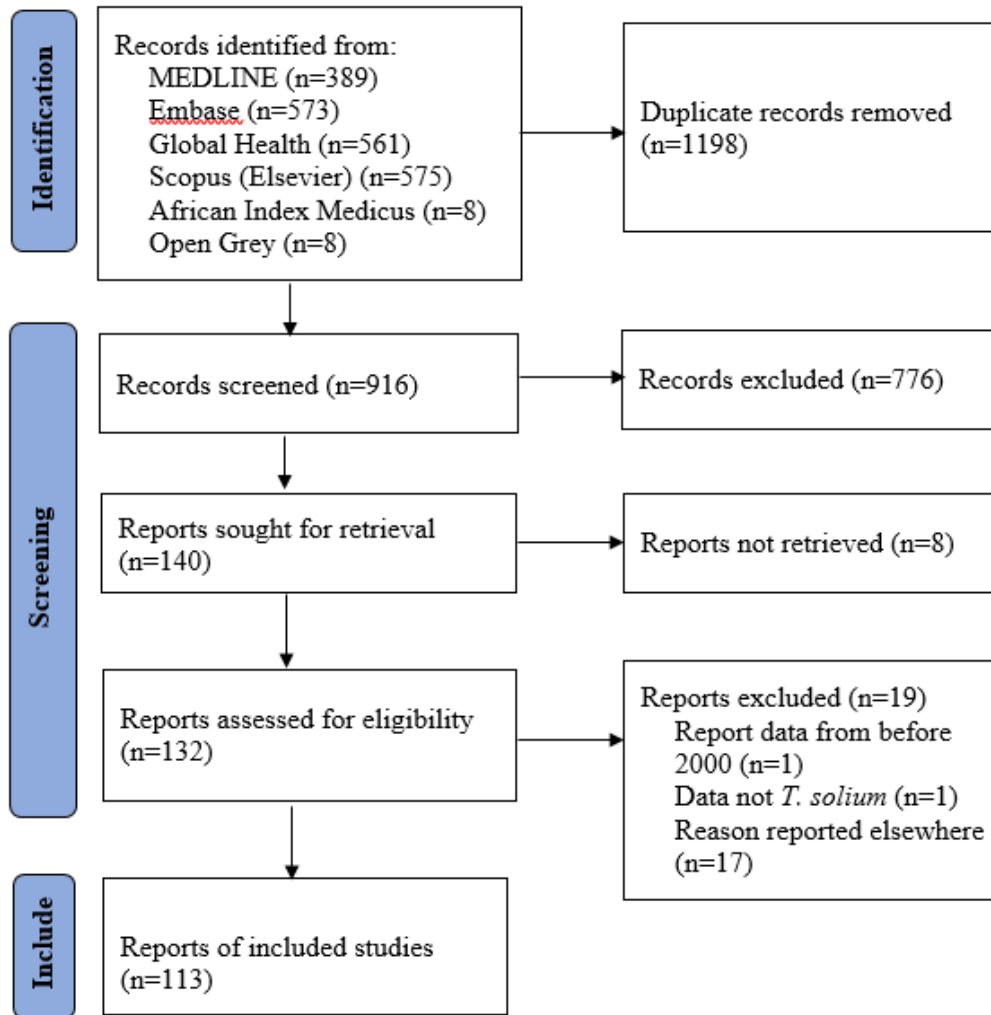

176

177 **Fig 1. PRISMA flow diagram**

## 178 **Risk of bias**

179 The risk of bias assessment revealed that most studies had a low risk of reporting, detection,

180 attrition and performance bias. However, 7 studies had a high risk of performance bias, 20 had a

181 high risk of bias due to inadequate inclusion and exclusion criteria, and 45 articles had a high risk  
182 of bias due to confounding and modifying variables.

## 183 **Results of individual studies**

### 184 **Human (neuro) cysticercosis**

185 Information on human (neuro) cysticercosis was obtained from 62 sources. In total, 25 (40%)  
186 records provided individual information on NCC and CC. Twelve (48%) of these records were on  
187 NCC only, seven (28%) on CC and six (24%) on both NCC and CC. Thirty-seven (60%) records  
188 reported aggregated information on NCC and CC. Ten (27%) of these records were on NCC only,  
189 twenty-one (57%) on CC only, and six (16%) on both NCC and CC. Information on human  
190 neuro(cysticercosis) was available for 14 of 27 ESA countries. No reports were available for  
191 Angola, Botswana, Comoros, Djibouti, Eritrea, Ethiopia, Lesotho, Mayotte, Reunion, Seychelles,  
192 Socotra, Somaliland and Somalia.

### 193 **Human cysticercosis case reports**

194 Individual human CC cases during the period 2000 to 2022 were reported in 13 hospital case  
195 records from six of the ESA countries with, South Africa reporting four cases; Madagascar,  
196 Malawi, Rwanda and Tanzania reporting two cases each and Mauritius reporting one case (Table  
197 1). Individual NCC cases were reported in 18 hospital records from eight of the ESA countries  
198 with South Africa reporting eight cases while Madagascar, Malawi and Zambia reported two cases  
199 each. Mozambique, Eswatini, Tanzania and Zimbabwe reported one case each (Table 2). All  
200 reports were based on individual patients presenting with various signs/symptoms, and  
201 investigations leading to their diagnosis of either CC or NCC. Twelve (48%) of the 25 case reports

202 described only NCC diagnosed through the use of brain computed tomography (CT) scan (7) and  
203 magnetic resonance imaging (MRI) (5), while seven (28%) presented with CC affecting other  
204 organs i.e. bronchus, breast, abdomen, neck and subcutaneous tissue diagnosed through  
205 histopathology and other investigations. Six (24%) case reports were on patients who presented  
206 with both NCC and CC affecting other organs (disseminated CC). At a district hospital in Rwanda  
207 ten cases of cutaneous CC were reported with the youngest being only 2 months old [13]. The  
208 oldest reported case of NCC was from South Africa in an 86-year-old female with a pharyngeal  
209 cyst, cutaneous cysts and active brain cysts [14]. The median age in years was 41 (17 -48 year).  
210 Twenty-three (92%) of the case reports had information on the affected gender with 54% of the  
211 reported cases being female and 46% being male.

212

213

214

215

216

217

218

219

220

It is made available under a [CC-BY 4.0 International license](#) .

221

222

223 **Table 1. Individual human cysticercosis case reports as detected through histopathology of sample specimens from patients in**  
 224 **eastern and southern Africa (2000 - 2022)**

| Country      | Age (yrs.)         | Gender | Sample                                                  | Location of pathogen                                                                                        | Comment                                                                                                                                                                        | Reference |
|--------------|--------------------|--------|---------------------------------------------------------|-------------------------------------------------------------------------------------------------------------|--------------------------------------------------------------------------------------------------------------------------------------------------------------------------------|-----------|
| Madagascar   | 20                 | Male   | Bronchial specimen                                      | Bronchus                                                                                                    | A 20-year-old male who presented with hemoptysis following bronchial cysticercosis.                                                                                            | [50]      |
|              | 15                 | Female | Breast lump                                             | Breast                                                                                                      | Breast cysticercosis in a 15-year-old girl.                                                                                                                                    | [51]      |
| Malawi       | 41                 | Female | Skin nodule                                             | Subcutaneous all over the body*                                                                             | A 41-year-old patient on ARVs with disseminated cysticercosis and more than 50 cysts in the brain.                                                                             | [52]      |
|              | 56                 | Female | Biopsy of neck mass                                     | Left anterior and posterior triangles of the neck                                                           | A 56-year-old woman with a history of gradual but progressive growing left sided neck swelling for the past 25 years.                                                          | [53]      |
| Mauritius    | 22                 | Female | Excision biopsy                                         | Upper part of right breast                                                                                  | A 22-year-old woman with history of painless mobile swelling in the right side of the breast.                                                                                  | [54]      |
| Rwanda       | 2 months - 65 yrs. | -      | Anatomical department files                             | Subcutaneous nodules                                                                                        | A case report of 10 cases of cutaneous cysticercosis confirmed by histopathology in the anatomical pathology department at a district hospital (Nyamasheke) in eastern Rwanda. | [13]      |
|              | 46                 | Female | Subcutaneous nodule                                     | Subcutaneous nodules on trunk and extremities                                                               | A 46-year-old woman who presented with a two-week history of bilateral lower limb weakness, causing difficulty walking.                                                        | [55]      |
| South Africa | 42                 | Male   | Biopsy of subcutaneous nodule                           | Extensive calcifications in the muscle and subcutaneous tissue. Active cysts within myocardium <sup>#</sup> | A 42-year-old man with a rare case of myocardial cysticercosis with multiple calcifications in the muscle and subcutaneous tissues.                                            | [56]      |
|              | 86                 | Female | Excised cyst from pharynx<br>Subcutaneous nodule biopsy | Left posterior oropharynx<br>Subcutaneous nodules on the back                                               | An 86-year-old woman with cysts in the left posterior oropharynx, brain and subcutaneous tissues on the neck and back.                                                         | [14]      |

| Country  | Age (yrs.) | Gender | Sample                     | Location of pathogen                                    | Comment                                                                                             | Reference |
|----------|------------|--------|----------------------------|---------------------------------------------------------|-----------------------------------------------------------------------------------------------------|-----------|
|          | 49         | Male   | Excisional nodule biopsy   | Subcutaneous nodules on the trunk and upper extremities | A 49-year-old man with generalized cysticercosis.                                                   | [57]      |
|          | 8          | Nr     | Cyst from pleural effusion | Right lung                                              | An 8-year-old child with pulmonary cysticercosis who presented with a large right pleural effusion. | [58]      |
| Tanzania | 4          | Male   | Subcutaneous sample biopsy | Sub mandibular and cervical region and abdomen          | A 4-year-old HIV positive child with disseminated cysticercosis.                                    | [59]      |
|          | 48         | Male   | Subcutaneous nodule        | Neck                                                    | A 48-year-old male driver with disseminated cysticercosis treated as malaria.                       | [60]      |

225

226 ARV, Antiretroviral medication; HIV, Human immunodeficiency virus; Yrs., Years.

227 \*detected through musculoskeletal ultrasound of nodules

228 #detected through chest and soft tissue Rontgen radiation (X-rays)

229

230

231 **Table 2. Individual human neurocysticercosis (NCC) case reports as detected by Brain CT in eastern and southern Africa (2000**  
 232 **- 2022)**

| Country      | Age<br>(yrs.) | Gender | Location of pathogen                                                                                                                                                                                                                                     | Comment                                                                                                                                                                                 | Reference |
|--------------|---------------|--------|----------------------------------------------------------------------------------------------------------------------------------------------------------------------------------------------------------------------------------------------------------|-----------------------------------------------------------------------------------------------------------------------------------------------------------------------------------------|-----------|
| Eswatini     | 40            | Male   | Multiple intra-parenchymal cysts, mural scoleces, calcified granulomas, right sided and parafalcine septated subdural collections, pathognomonic of racemose, stage I and stage IV NCC                                                                   | A 40-year-old male with a history of chronic headache, unsteady gait and progressive deterioration in vision.                                                                           | [69]      |
| Madagascar   | 71            | Male   | Not described*                                                                                                                                                                                                                                           | A 71-year-old man with dysarthria and memory problems.                                                                                                                                  | [61]      |
|              | 31            | Male   | Two ring enhancing lesions in the left capsulo-lenticular. <sup>†</sup>                                                                                                                                                                                  | A 31-year-old man presenting with dysarthria, blurred vision and monoparesis of the right upper limb 7 weeks after starting anti-tuberculosis medication.                               | [62]      |
| Malawi       | 58            | Female | Multicystic lesion in the left temporal lobe <sup>¶#</sup>                                                                                                                                                                                               | A 58-year-old woman with coincidental racemose NCC who was being treated for HIV associated cryptococcal meningitis, clinically and microbiologically responding to antifungal therapy. | [63]      |
|              | 41            | Female | Multiple intra-parenchymal cyst in the brain                                                                                                                                                                                                             | A 41-year-old patient on ARVs with disseminated cysticercosis and more than 50 cysts in brain.                                                                                          | [52]      |
| Mozambique   | 18            | Female | Multiple lesions with different stages ranging from cerebral ring-enhancing cysts with scolices to transitional or degenerative colloidal cysts to multiple parenchymal calcifications                                                                   | An 18-year-old female admitted to Hospital Central de Quelimane, Zambezia province in Mozambique, 8 days after delivery with a misdiagnosis of eclampsia that turned out to be NCC.     | [64]      |
| South Africa | 52            | Female | Granuloma within bilateral frontal and temporal lobes; Multicystic racemose lesion in the right cerebellar hemisphere; active cyst within the left cerebellar hemisphere; hydrocephalus with blocked ventriculo- peritoneal shunt; Intraventricular cyst | A 52-year-old woman with multiple types of NCC pathology.                                                                                                                               | [65]      |



| Country  | Age (yrs.) | Gender | Location of pathogen                                                                                                                         | Comment                                                                                                                                                                                   | Reference |
|----------|------------|--------|----------------------------------------------------------------------------------------------------------------------------------------------|-------------------------------------------------------------------------------------------------------------------------------------------------------------------------------------------|-----------|
|          | 42         | Male   | Multiple active and calcified lesions in the brain.                                                                                          | A 42-year-old man with NCC and disseminated cysticercosis with myocardial involvement and with multiple calcifications in the muscle and subcutaneous regions.                            | [56]      |
|          | 86         | Female | Active brain cysts (not specific)                                                                                                            | An 86-year-old woman with NCC and cysts in the left posterior oropharynx and subcutaneous tissues on the neck and back.                                                                   | [14]      |
|          | 49         | Male   | Bilateral multiple parenchymal non-enhancing cerebral cystic lesions                                                                         | A 49-year-old man with generalized cysticercosis.                                                                                                                                         | [57]      |
|          | 46         | Female | Spinal and vertebra region. A spinal lesion at T12, causing vertebral collapse <sup>#\$†</sup>                                               | A 46-year-old HIV+ patient with NCC affecting the spine with severe pain with spasms and weakness in lower limbs.                                                                         | [66]      |
|          | 30         | Female | Cyst in the occipital horn of the right lateral ventricle                                                                                    | A 30-year-old woman with acute unilateral hydrocephalus.                                                                                                                                  | [67]      |
|          | 8          | -      | A non-specific solitary sub centimeter calcified granuloma abutting the tentorium cerebellum                                                 | Letter to the editor of a case report on an 8-year-old child with pulmonary cysticercosis who presented to Red Cross children's hospital, Cape Town, with a large right pleural effusion. | [58]      |
|          | 32         | Male   | Brain with isolated cystic lesions with scolex and ring enhancing lesion in colloidal stage                                                  | A 32-year-old known PWE admitted with COVID-19 and developed recurrent epileptic seizures due to dying cysts after beginning of NCC treatment.                                            | [68]      |
|          | 42         | Female | Not described                                                                                                                                | A 42-year-old known PWE admitted with COVID-19 and NCC with poor response to treatment and in status epilepticus for a long time.                                                         |           |
| Tanzania | 48         | Male   | Multiple cystic lesions with dot sign diffusely distributed in the brain, neck, chest, including the heart, abdomen, and pelvis <sup>†</sup> | A 48-year-old driver with disseminated cysticercosis treated as malaria.                                                                                                                  | [60]      |
| Zambia   | 48         | Female | Numerous round points with T1 hypo intense, T2 hyper intense dot-form cores seen in all cerebral slices. <sup>#</sup>                        | A 48-year-old woman who presented with subcutaneous nodules on the face, recurrent headache and epileptic seizures in Chambishi Zambia.                                                   | [70]      |

| Country  | Age<br>(yrs.) | Gender | Location of pathogen                                                                             | Comment                                                                                                                                   | Reference |
|----------|---------------|--------|--------------------------------------------------------------------------------------------------|-------------------------------------------------------------------------------------------------------------------------------------------|-----------|
|          | 60            | Male   | Thoracic intramedullary cystic lesions. Also cystic lesions in subcutaneous tissue <sup>#†</sup> | A 60-year-old man with progressive lower extremity weakness and numbness at University Teaching Hospital in Zambia.                       | [71]      |
| Zimbabwe | 35            | Male   | A Suprasellar cystic lesion compressing the optic nerve <sup>#§</sup>                            | A 35-year-old man presenting with pain accompanied by mild vision loss in the right eye due to a cystic mass compressing the optic nerve. | [72]      |

233

234 Ag-ELISA, Antigen based enzyme linked immunosorbent assay; ARVs, Antiretroviral medication; CSF, Cerebrospinal fluid; CT, Computed tomography; EITB,

235 Enzyme linked electroimmunotransfer blot; ELISA, Enzyme linked immunosorbent assay; HIV, Human immunodeficiency virus; MRI, Magnetic resonance

236 imaging; NCC, Neurocysticercosis; Yrs., Years.

237 \* Serology with Ag-ELISA and EITB also used for diagnosis

238 † CSF ELISA also used for diagnosis

239 # MRI employed as detection method

240 † CT of head, neck chest, abdomen, pelvis employed as detection method

241 § Histopathology employed as detection method

242 † NCC affecting the spine with no brain involvement

243

244

## 245 **Aggregated human cysticercosis**

246 The number of aggregated human CC reports (community-based, cross-sectional studies) for the  
247 period 2000 to 2022 in ESA was 27 (Table 3). These were reports from 9 nine countries, the  
248 majority of which were conducted in Tanzania (n=7) followed by Madagascar (n=6) and Zambia  
249 (n=4). South Africa, Mozambique, Rwanda and Kenya had two reports each. For Burundi and  
250 Uganda one report each was available. There was great variation in the aggregated number of  
251 human CC cases across countries with over 2307 cases reported from Madagascar only. The  
252 number of human CC cases identified in other ESA countries in documents published between  
253 2000 and 2022 is shown in (Fig 2) below.

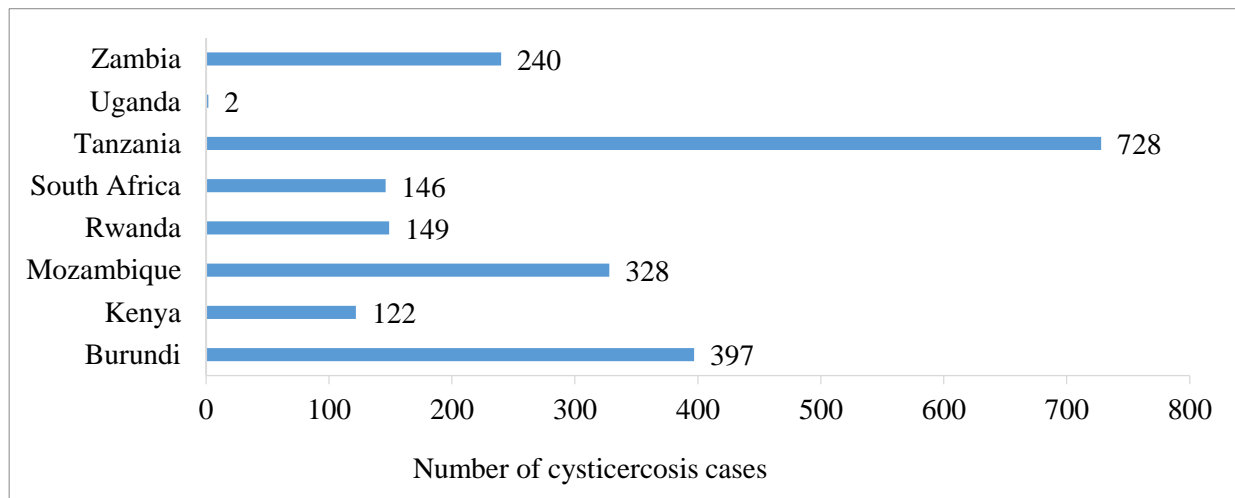

254  
255 **Fig 2. Aggregated human cysticercosis cases reported in community-based cross-sectional**  
256 **studies in eastern and southern Africa between the years 2000 and 2022.**

257

258

259

260 **Table 3. Aggregated human cysticercosis cases identified in eastern and southern Africa (2000 - 2022).**

| Country    | No. Tested | Prevalence No. (%)      | method                   | Comment                                                                                                                                                                                                                                                                   | Reference |
|------------|------------|-------------------------|--------------------------|---------------------------------------------------------------------------------------------------------------------------------------------------------------------------------------------------------------------------------------------------------------------------|-----------|
| Burundi    | 972        | 397 (40.8)              | Ag-ELISA                 | A prevalence matched case-control design used in the Kiremba area, Burundi to evaluate the role of cysticercosis in PWE.                                                                                                                                                  | [73]      |
| Kenya      | 2113       | 122 (5.8)               | HP10-ELISA               | A cross-sectional survey around the Lake Victoria region to evaluate human and animal zoonotic and non-zoonotic disease in a rural farming community.                                                                                                                     | [23]      |
|            | 17         | 0 (0) <sup>†</sup>      | Ag-ELISA                 | A cross-sectional study to determine the prevalence of cysticercosis and NCC among PWE (17) and PWOE (12) in a pig keeping community in Western Kenya.                                                                                                                    | [18]      |
|            | 12         | 1 (8.3) <sup>†</sup>    |                          |                                                                                                                                                                                                                                                                           |           |
| Madagascar | 73         | 6 (8.2) <sup>†</sup>    | EITB                     | Screening of peace corps volunteers for cysticercosis and NCC before their return from Madagascar.                                                                                                                                                                        | [74]      |
|            | 1751       | 485 (27.7)              | B158 / B60<br>Ag-ELISA   | A cross-sectional study to investigate the prevalence of active cysticercosis and associated risk factors in school children (3-16years) in seven cities in Madagascar.                                                                                                   | [75]      |
|            | 2094       | 527 (25.2)              | Ag-ELISA                 | An epidemiology study to evaluate cysticercosis seroprevalence in Madagascar in two groups. Group 1: All age groups (2-24) in Antananarivo, capital of Madagascar (n = 2094).<br>Group 2: Children aged between 3 to 16 years old from seven different cities (n = 1799). | [76]      |
|            | 2048       | 269 (13.1)              | rT24-ELISA               |                                                                                                                                                                                                                                                                           |           |
|            | 1760       | 489 (27.8)              | Ag-ELISA                 |                                                                                                                                                                                                                                                                           |           |
|            | 1799       | 242 (13.4)              | rT24-ELISA               | A retrospective study on 76 patients hospitalized for NCC in the pediatrics department of the Tamatave University Hospital Center to evaluate the epidemiological aspect of NCC.                                                                                          | [77]      |
|            | 3619       | 76 (2.1)                | Serology (not specified) |                                                                                                                                                                                                                                                                           |           |
|            | 237        | 35 (14.8)               | IgG-Western blot         | A cross-sectional descriptive study at the Regional Referral Hospital in Antsirabe to determine the seroprevalence of cysticercosis as well as its associated risk factors in patients from the region of Vakinankaratra with clinical suspicion.                         | [78]      |
|            | 543        | 166 (30.6)              | Ag-ELISA                 | A review of cysticercosis in Madagascar. Data for 2017 national survey in Infanadiana district.                                                                                                                                                                           | [79]      |
| 12         | 2 (2.2)    | EITB                    |                          |                                                                                                                                                                                                                                                                           |           |
| Mozambique | 1723       | 267 (15.5) <sup>†</sup> | Ag-ELISA                 | A cross-sectional study to estimate the prevalence of NCC in Angónia district, Tete province, Mozambique based on prevalence of human <i>T. solium</i> cysticercosis.                                                                                                     | [80]      |

| Country      | No. Tested              | Prevalence No. (%)      | method                                                                                                | Comment                                                                                                                                                                                    | Reference |
|--------------|-------------------------|-------------------------|-------------------------------------------------------------------------------------------------------|--------------------------------------------------------------------------------------------------------------------------------------------------------------------------------------------|-----------|
| Mozambique   | 601                     | 61 (10.2)               | IgG-Western blot                                                                                      | A cross-sectional serological study among HIV infected people in Beira (Ponta Gea Health Centre (PGHC)), located in the central part of the Mozambique.                                    | [81]      |
| Rwanda       | 211                     | 46 (21.8) <sup>†</sup>  | Immunoblot<br>CSF ELISA                                                                               | A health-facility based study in the southern province of Rwanda to determine the prevalence of NCC among PWE.                                                                             | [82]      |
|              | 572                     | 76 (13.3)               | EITB                                                                                                  | A cross-sectional study conducted in 680 children from a rural primary school in Gakenke district, Northern province to assess the prevalence of <i>T. solium</i> taeniosis cysticercosis. | [24]      |
|              | 71                      | 27 (38)                 | Ag-ELISA                                                                                              |                                                                                                                                                                                            |           |
| South Africa | 113                     | 42 (37.2) <sup>†</sup>  | IgG-Western blot                                                                                      | A descriptive prospective study to survey the prevalence of NCC in PWE in Lusikisiki, Eastern Cape province.                                                                               | [19]      |
|              | 281                     | 89 (32.6) <sup>†</sup>  | Ab-ELISA                                                                                              | A cross-sectional study of NCC prevalence among PWE at St Elizabeth hospital Eastern Cape province.                                                                                        | [83]      |
|              |                         | 15 (7.9)                | Ag-ELISA                                                                                              |                                                                                                                                                                                            |           |
| Tanzania     | 20                      | 6 (30) <sup>†</sup>     | Ag-ELISA                                                                                              | A cross-sectional study to assess the prevalence of NCC among PWE in northern Tanzania.                                                                                                    | [84]      |
|              | 830                     | 139 (16.7) <sup>†</sup> | Ag-ELISA                                                                                              | A cross-sectional study to determine prevalence and risk factors of human <i>T. solium</i> infections in Mbeya Region of Tanzania.                                                         | [16]      |
|              |                         | 376 (45.3)              | Ab-ELISA                                                                                              |                                                                                                                                                                                            |           |
|              | 218                     | 6 (2.8) <sup>†</sup>    | Ag-/ Ab-ELISA                                                                                         | A cross-sectional study among PWE in a door-to-door study in an established demographic surveillance site in Hai district North East Tanzania.                                             | [85]      |
|              | 404                     | 10 (2.5)                | Ag-/ Ab-ELISA                                                                                         | A cross-sectional study to estimate the prevalence of and factors associated with <i>T. solium</i> infections among HIV+ and HIV - individuals in Mbulu district, northern Tanzania.       | [86]      |
|              | 302                     | 3 (0.99)                | Ag-ELISA                                                                                              | A cross-sectional study to investigate the presence and prevalence of TSTC in PWE in Dar es Salaam.                                                                                        | [87]      |
|              |                         | 8 (2.65)                | Ab-ELISA                                                                                              |                                                                                                                                                                                            |           |
|              | 528                     | 9 (1.7)                 | Ab-ELISA                                                                                              | Tanzania results from a multi-center case-control study using prevalent cases of ACE identified from HDSS in Tanzania, Kenya, Uganda and South Africa.                                     | [88]      |
| 1051         | 171 (16.3) <sup>†</sup> | Ab-ELISA                | A cross-sectional study conducted to determine the status and health burden of NCC in Mbulu district. | [89]                                                                                                                                                                                       |           |
| Uganda       | 84                      | 2 (2.4)                 | Ab-/ Ag-ELISA                                                                                         | Uganda results from a multi centre case-control study using prevalent cases of ACE identified from HDSS in Tanzania, Kenya, Uganda and South Africa.                                       | [90]      |

| Country | No. Tested | Prevalence No. (%)                  | method                                               | Comment                                                                                                                                                             | Reference |
|---------|------------|-------------------------------------|------------------------------------------------------|---------------------------------------------------------------------------------------------------------------------------------------------------------------------|-----------|
| Zambia  | 708        | 41 (5.8)                            | Ag-ELISA                                             | A community-based cross-sectional survey to determine the prevalence of human taeniosis and cysticercosis in Petauke district in Eastern province.                  | [20]      |
|         | 867        | (12.2– 14.5)<br>(33.5– 38.5)        | Ag-ELISA<br>EITB                                     | A prospective study conducted to ascertain the incidence of human cysticercosis in Katete district in Eastern province.                                             | [91]      |
|         | 56         | 22 (39.3) <sup>†</sup><br>13 (23.2) | Ab-ELISA<br>Ag-ELISA                                 | A cross-sectional study to assess NCC prevalence among PWE in Katete district in Eastern province.                                                                  | [41]      |
|         | 9          | 9 (-)                               | Histopathology<br>Full body dissection<br>postmortem | A descriptive study looking at postmortem examinations of the past 12 months for cardiac cysticercosis and NCC in sudden and unexpected community deaths in Lusaka. | [15]      |

261

262 ACE, Active convulsive epilepsy; Ab-ELISA, Antibody based ELISA; Ag-ELISA, Antigen based ELISA; B158/B60, an antigen detecting ELISA; CSF,  
263 Cerebrospinal fluid; CT, Computed tomography; EITB, Enzyme linked electroimmunotransfer blot; ELISA, Enzyme linked immunosorbent Assay; HDSS, Health  
264 demographic surveillance systems; HIV, Human immunodeficiency virus; HP10-ELISA, an antigen detecting ELISA; NCC, Neurocysticercosis; No., Number;  
265 PWE, People with epilepsy; PWOE, People without epilepsy; rT24-ELISA; A recombinant antibody detecting ELISA; TSTC, *Taenia solium* taeniosis cysticercosis.

266

267 <sup>†</sup> Employed imaging in addition to serology.

268 To ascertain cases of aggregated human CC, various diagnostic methods were utilized in the  
269 included reports with eight (30%) studies employing a combination of antibody and antigen  
270 (Ab/Ag) based enzyme linked immunosorbent assay (ELISA), five (19%) employed Ag-ELISA,  
271 while three reports (11%) utilized a combination of Ag-ELISA and electroimmunotransfer blot  
272 assay (EITB). One report (4%) was based on postmortem findings of CC through full-body  
273 dissection [15]. The other methods used for CC diagnosis are shown in (Fig 3).

274

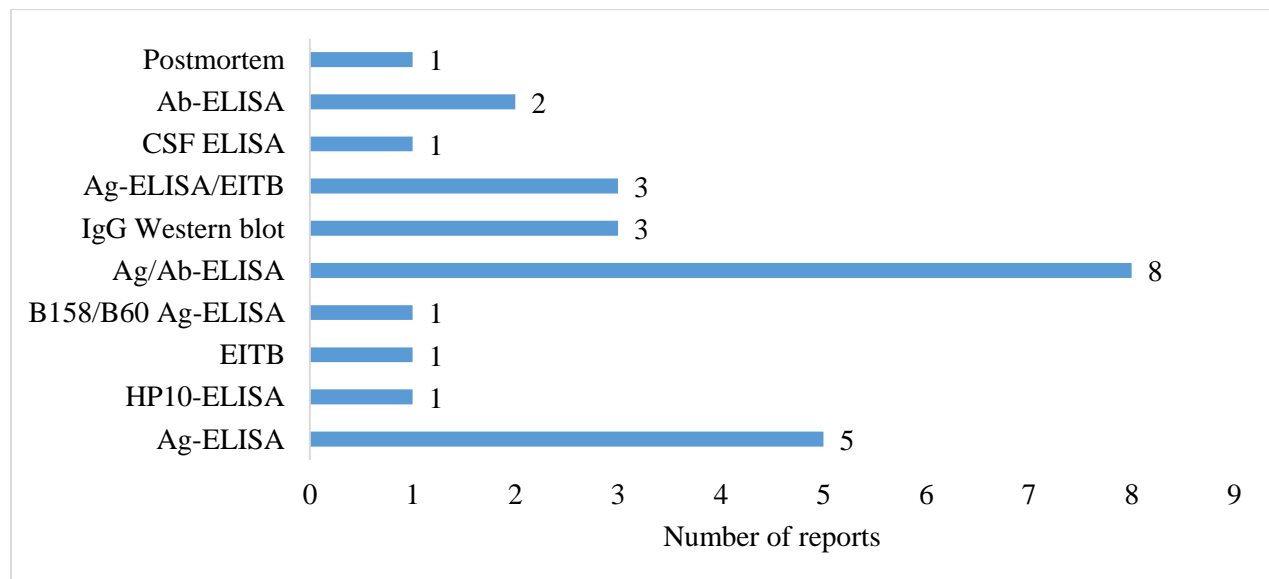

275

276 **Fig 3. Diagnostic methods used for aggregated human cysticercosis cases in the included**  
277 **studies for eastern and southern Africa**

278 The prevalence of human CC in ESA in different study populations showed wide variation within  
279 and between countries (Fig 4 and Table 3). The CC seroprevalence ranged between 0.99 – 40.8%  
280 on Ag tests and between 1.7 – 45.3% on Ab tests. The highest point prevalence was reported in  
281 Tanzania (45.3%) from a study conducted in the Mbozi area of Mbeya District [16].

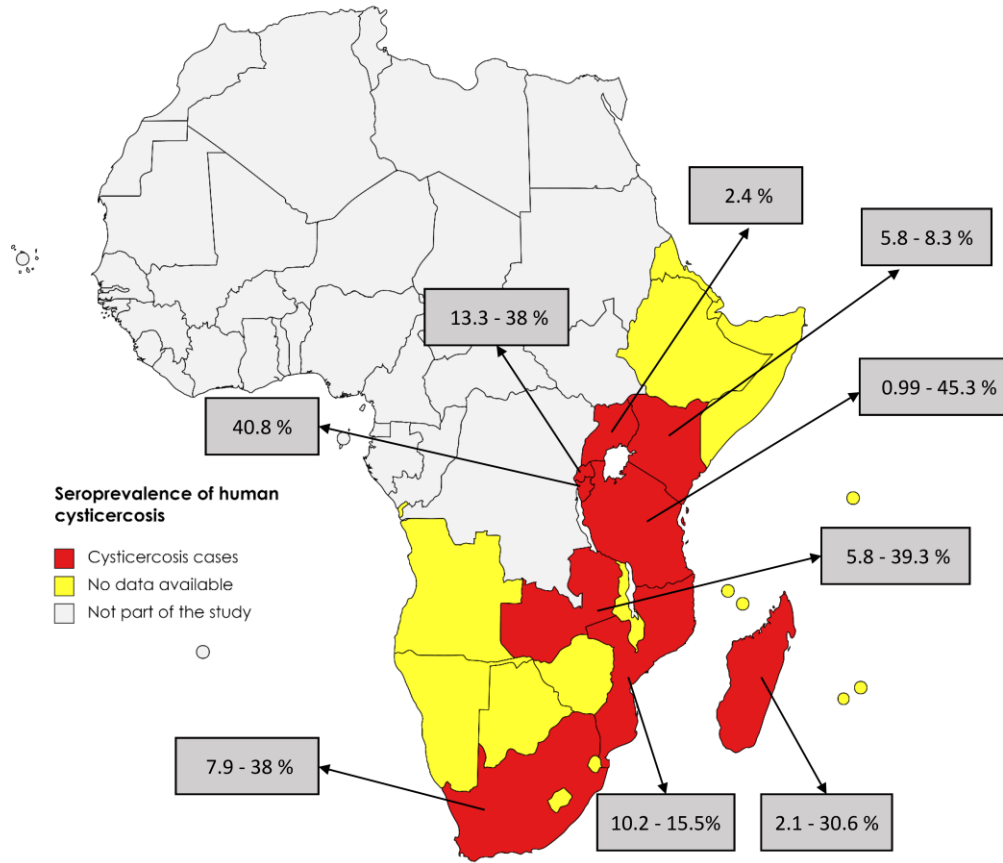

282

283 **Fig 4. The distribution of human cysticercosis seroprevalence in the included studies for**  
284 **eastern and southern Africa.**

285 For the studies conducted within Tanzania, this was an outlier value. High prevalence variation  
286 was also observed within countries as seen in Madagascar, Rwanda, South Africa and Zambia (Fig  
287 5). The lowest point prevalence (0.99%) was also reported from Tanzania. For details on sources  
288 refer to Table 3.

289



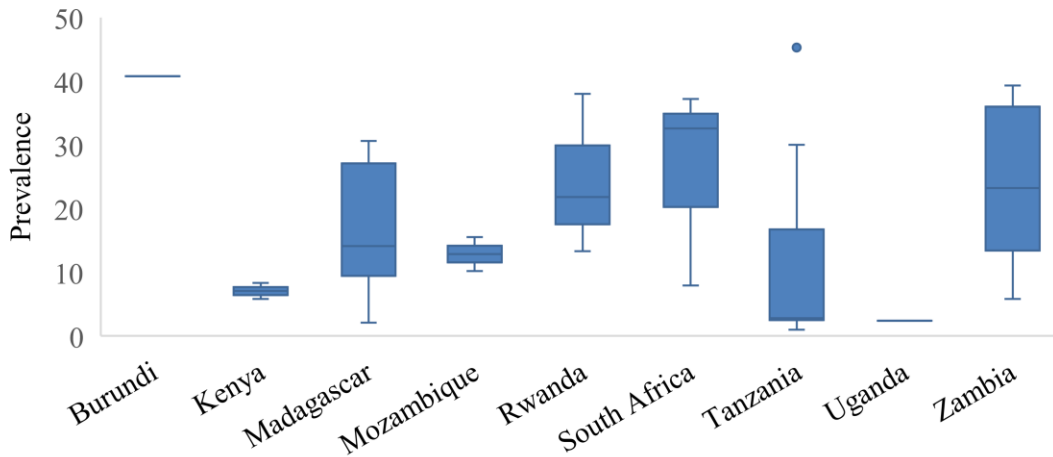

290

291 **Fig 5. Prevalence of human cysticercosis in eastern and southern Africa based on serology**  
292 **data in reviewed studies with high variation observed in Rwanda, South Africa, Tanzania**  
293 **and Zambia**

#### 294 **Aggregated human neurocysticercosis**

295 For reports presenting aggregated NCC cases (Table 4), 16 records were available. Four (25%)  
296 employed imaging (brain CT or MRI) only, whereas 11 (69%) incorporated both imaging and  
297 serological tests, and one (6%) was based on postmortem full-body dissection. The NCC-  
298 suggestive lesions on brain CT scans showed a prevalence range between 1.0 – 76% in different  
299 study populations in ESA (Fig 6 and Table 4).

300

301

302

303

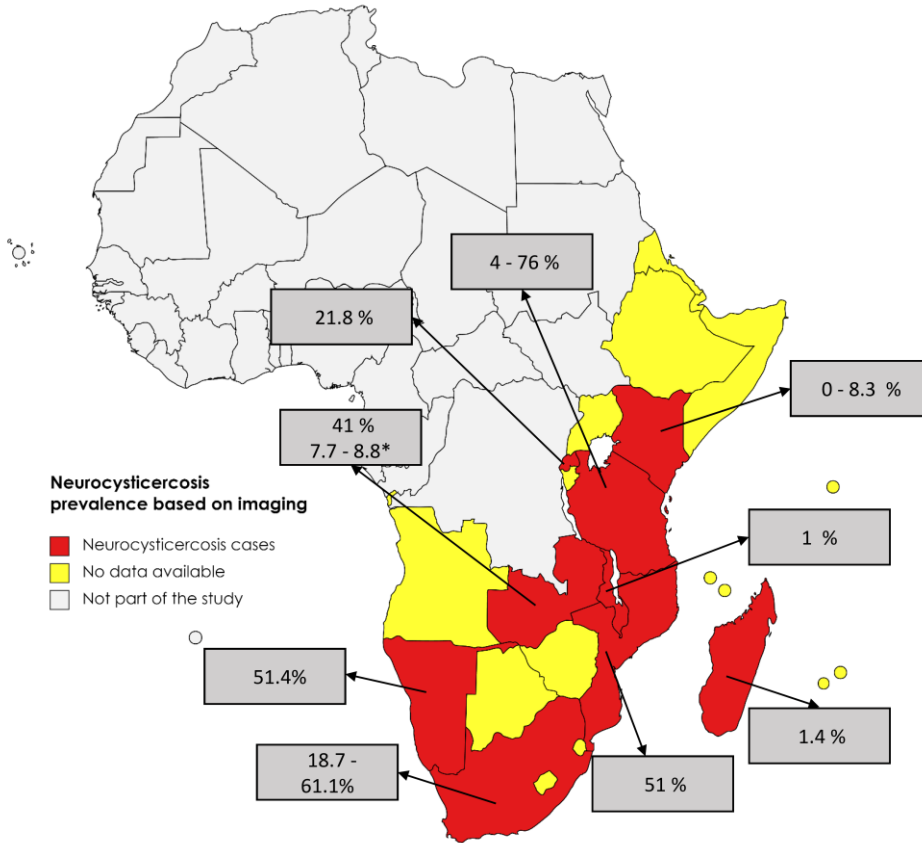

304

305 **Fig 6. The distribution of human neurocysticercosis prevalence based on imaging data in**  
306 **reviewed studies in eastern and southern Africa. \*Prevalence based on MRI**

307 One report utilized MRI to identify lesions suggestive of NCC in HIV+ children. In this report,  
308 four children (8.5% of the total) were found to have NCC, with imaging suggesting the vesicular  
309 (active) stage of NCC in all of them [17].

310

311

312

313

314 **Table 4. Aggregated human neurocysticercosis cases as detected by Brain CT scan in eastern and southern Africa (2000 - 2022)**

| Country      | No. Tested | Prevalence             | Comment                                                                                                                                                                             | Reference |
|--------------|------------|------------------------|-------------------------------------------------------------------------------------------------------------------------------------------------------------------------------------|-----------|
|              |            | No. (%)                |                                                                                                                                                                                     |           |
| Kenya        | 17         | 0 (0) <sup>†</sup>     | A cross-sectional study to determine the prevalence of cysticercosis and NCC among PWE (17) and PWOE (12) in a pig keeping community in Western Kenya.                              | [18]      |
|              | 12         | 1 (8.3) <sup>†</sup>   |                                                                                                                                                                                     |           |
| Madagascar   | 73         | 1 (1.4) <sup>†</sup>   | Screening of peace corps volunteers for cysticercosis and NCC before their return from Madagascar.                                                                                  | [74]      |
| Malawi       | 98         | 1 (1)                  | Hospital study on patients presenting with a stroke in Blantyre hospital.                                                                                                           | [92]      |
| Mozambique   | 151        | 77 (51) <sup>†</sup>   | A cross-sectional study to estimate the prevalence of NCC in Angónia district, Tete province, Mozambique based on prevalence of human <i>T. solium</i> cysticercosis.               | [80]      |
| Namibia      | 117        | 96 (51.4)              | An analytical cross-sectional study conducted among patients with a first seizure presenting to the casualty and medical in-patient wards of Oshakati hospital in northern Namibia. | [93]      |
| Rwanda       | 211        | 46 (21.8) <sup>†</sup> | A health-facility based study in the southern province of Rwanda to determine the prevalence of NCC among PWE.                                                                      | [82]      |
| South Africa | 113        | 69 (61.1) <sup>†</sup> | A descriptive prospective study to survey the prevalence of NCC in PWE in Lusikisiki, Eastern Cape province.                                                                        | [19]      |
|              | 92         | 34 (37) <sup>†</sup>   | A cross-sectional study of NCC prevalence among PWE at St Elizabeth hospital Eastern Cape province.                                                                                 | [83]      |
|              | 75         | 14 (18.7)              | A retrospective review of the brain CT findings in adults presenting with new-onset seizures in a tertiary hospital in Gauteng province.                                            | [94]      |
| Tanzania     | 212        | 68 (32.1) <sup>†</sup> | A cross-sectional study to assess the prevalence of NCC among PWE in northern Tanzania.                                                                                             | [84]      |
|              | 55         | 30 (54.6) <sup>†</sup> | A cross-sectional study to determine prevalence and risk factors of human <i>T. solium</i> infections in Mbeya Region of Tanzania.                                                  | [16]      |
|              | 200        | 8 (4) <sup>†</sup>     | A cross-sectional study among PWE in a door-to-door study in an established demographic surveillance site in Hai district North East Tanzania.                                      | [85]      |
|              | 25         | 19 (76) <sup>†</sup>   | A cross-sectional study conducted to determine the status and health burden of NCC in Mbulu district.                                                                               | [89]      |

| Country | No. Tested | Prevalence No. (%)   | Comment                                                                                                                                                              | Reference |
|---------|------------|----------------------|----------------------------------------------------------------------------------------------------------------------------------------------------------------------|-----------|
| Zambia  | 49         | 20 (41) <sup>‡</sup> | A cross-sectional study to assess NCC prevalence among PWE in Katete district in Eastern province.                                                                   | [41]      |
|         | 34         | 3 (8.8) <sup>*</sup> | Observational study of cognition and HIV in children's hospital Lusaka. Three of 34 HIV+ participants and one of 13 controls were found to have neurocysticercosis.  | [17]      |
|         | 13         | 1 (7.7) <sup>*</sup> |                                                                                                                                                                      |           |
|         | 9          | 9 (-) <sup>#</sup>   | A descriptive study looking at postmortem examinations for the past 12 months for cardiac cysticercosis and NCC in sudden and unexpected community deaths in Lusaka. | [15]      |

315

316 CC+, Cysticercosis positive; CT, Computed tomography; EITB, Enzyme linked electroimmunotransfer blot; HIV, Human immunodeficiency virus; MRI, Magnetic  
 317 resonance imaging; NCC, Neurocysticercosis; No., Number; PWE, People with epilepsy; PWOE, People without epilepsy.

318 <sup>\*</sup> NCC detected through use of MRI

319 <sup>#</sup> NCC detected through full body dissection postmortem histopathology

320 <sup>‡</sup> Employed serology in addition to imaging

321

## 322 **Neurocysticercosis and epilepsy**

323 Among the 16 records reporting aggregated NCC, nine (56%) reported data linking NCC and  
324 epilepsy (Table 5). Three of these records were reported from South Africa whereas one record  
325 each was reported from Kenya, Mozambique, Namibia, Rwanda, Tanzania and Zambia. Three  
326 (33%) of these NCC epilepsy studies were community-based studies and six (67%) were  
327 conducted in hospital/health facility settings. The prevalence of NCC among people with epilepsy  
328 ranged between 0 – 61%. One study in Kenya in a *T. solium* endemic area found none of the  
329 participants with epilepsy had serological evidence of cysticercosis and none had radiographic  
330 findings consistent with NCC [18]. Whereas at St Elizabeth’s Hospital, Lusikisiki, Eastern Cape,  
331 61% of the patients presenting with epilepsy had NCC associated epilepsy, the prevalence being  
332 highest in the 10 - 19-year-old age group [19]. For details on sources refer to Table 5.

333

334

335

336

337

338

339

340

341 **Table 5. Human neurocysticercosis with epilepsy as detected by Brain CT scan in eastern and southern Africa (2000 - 2022).**

| Country      | No Tested | Prevalence No (%)      | Comment                                                                                                                                                                             | Reference |
|--------------|-----------|------------------------|-------------------------------------------------------------------------------------------------------------------------------------------------------------------------------------|-----------|
| Kenya        | 17        | 0 (0) <sup>¶</sup>     | A cross-sectional study to determine the prevalence of cysticercosis and NCC among PWE in a pig keeping community in Western Kenya                                                  | [18]      |
| Mozambique   | 151       | 77 (51) <sup>¶</sup>   | A cross-sectional study to estimate the prevalence of NCC in Angónia district, Tete province, Mozambique based on prevalence of human <i>T. solium</i> cysticercosis.               | [80]      |
| Namibia      | 117       | 96 (51.4)              | An analytical cross-sectional study conducted among patients with a first seizure presenting to the casualty and medical in-patient wards of Oshakati hospital in northern Namibia. | [93]      |
| Rwanda       | 211       | 46 (21.8) <sup>¶</sup> | A health-facility based study in the southern province of Rwanda to determine the prevalence of NCC among PWE.                                                                      | [82]      |
| South Africa | 113       | 69 (61.1) <sup>¶</sup> | A descriptive prospective study to survey the prevalence of NCC in PWE in Lusikisiki, Eastern Cape province.                                                                        | [19]      |
|              | 92        | 34 (37) <sup>¶</sup>   | A cross-sectional study of NCC prevalence among PWE at St Elizabeth hospital Eastern Cape province.                                                                                 | [83]      |
|              | 75        | 14 (18.7)              | A retrospective review of the brain CT findings in adults presenting with new-onset seizures in a tertiary hospital in Gauteng province.                                            | [94]      |
| Tanzania     | 212       | 68 (32.1) <sup>¶</sup> | A cross-sectional study to assess the prevalence of NCC among PWE in northern Tanzania.                                                                                             | [84]      |
| Zambia       | 49        | 20 (41) <sup>¶</sup>   | A cross-sectional study to assess NCC prevalence among PWE in Katete district in Eastern province.                                                                                  | [41]      |

342

343 CT, Computed tomography; NCC, Neurocysticercosis; PWE, People with epilepsy.

344 <sup>¶</sup> Employed serology in addition to imaging

## 345 Human taeniosis

346 A total of 64 records were identified providing information on taeniosis cases in ESA for the period  
347 2000 to 2022 (Table 6). These records were reported in 11 out of 27 ESA countries (Fig 7) with  
348 Ethiopia reporting the most records (n=38) followed by Tanzania (n=6) and Zambia (n=5). Kenya  
349 and Uganda had three records each while Angola, Mozambique, and South Africa had two records  
350 each. Malawi, Madagascar and Rwanda had one record each. There were no cases reported from  
351 Botswana, Burundi, Comoros, Djibouti, Eritrea, Lesotho, Mauritius, Mayotte, Namibia, Reunion,  
352 Seychelles, Socotra, Somalia, Somaliland, Swaziland, and Zimbabwe.

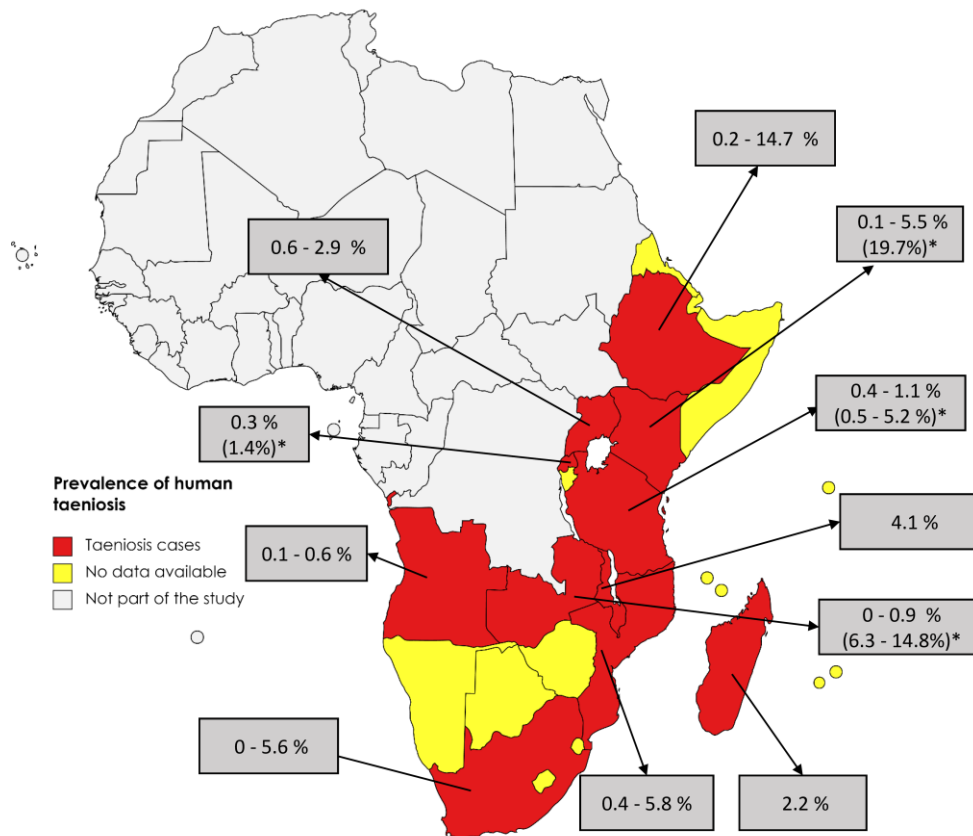

353

354 **Fig 7. The distribution of human taeniosis in eastern and southern Africa showing prevalence**  
355 **data on microscopy and \*prevalence based on serology (rES33-immunoblot, Ag-ELISA),**  
356 **and Copro-Ag ELISA)**

357 Several groups of people were studied for human taeniosis with 25 records reporting taeniosis  
358 cases in school children, 18 records on patients presenting at health facilities, 15 on consenting  
359 community volunteers, and six on food handlers. There was great variation in aggregated numbers  
360 of human taeniosis cases across countries with 595 cases reported from Ethiopia alone and even  
361 more (4834) reported from Mozambique. The number of human taeniosis cases identified for the  
362 other nine countries in ESA is shown in (Fig 8).

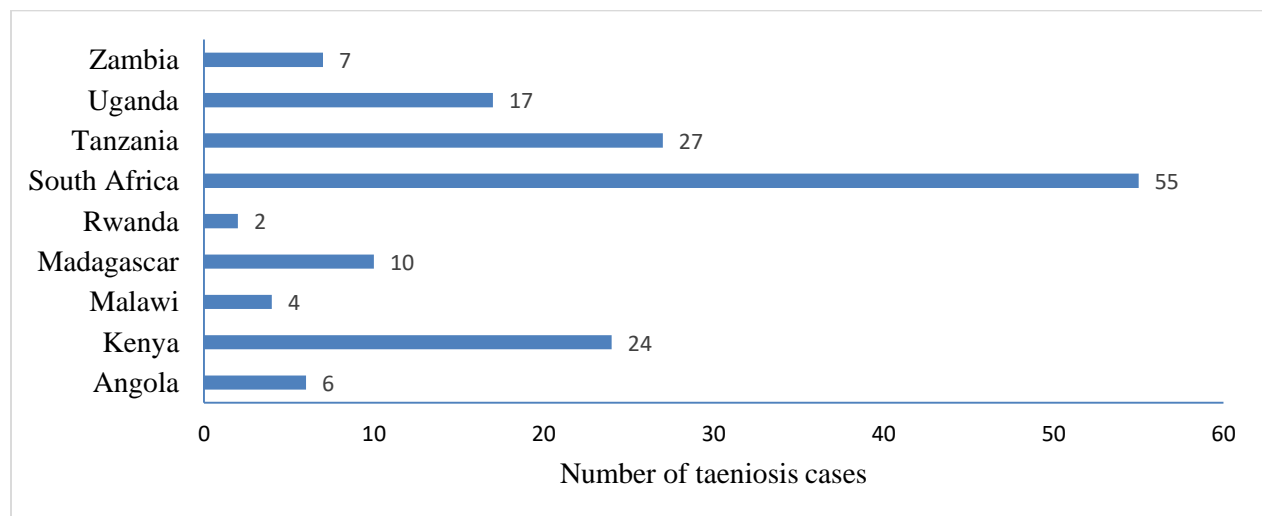

363

364 **Fig 8. Taeniosis cases reported in eastern and southern Africa between 2000 – 2020**

365 The largest number of cases were reported as *Taenia spp.* (Table 6) without specifying the type of  
366 species. In only two records from Madagascar and Zambia, *T. solium* was confirmed using PCR  
367 [20,21]. Microscopy only was employed for 53 studies, and copro Ag-ELISA only in three studies.  
368 Five studies used both copro Ag-ELISA and microscopy for taeniosis diagnosis. Three studies



369 used the rES33 EITB for the presence of a tapeworm antibodies in the body. Immunological data  
370 (copro Ag-ELISA or rES33 EITB) on taeniosis was only available from Kenya, Rwanda,  
371 Tanzania, and Zambia.

372 Within the ESA region, the prevalence of human taeniosis based on microscopy ranged between  
373 0.1 - 14.7% with the highest prevalence reported in a study conducted among food handlers at  
374 Wolkite University in Ethiopia [22] (Figs 7 and 9). Among studies based on copro Ag-ELISA  
375 conducted in Kenya, Rwanda, Tanzania, and Zambia, the highest prevalence was reported in  
376 Kenya at 19.7% [23]. Rwanda had a taeniosis prevalence of 1.4% [24], Tanzania ranged between  
377 0.5 to 5.2% [16,25] [16], [22] and Zambia ranged between 0.3 to 13.8% [20,26] (Fig 10). For  
378 details on sources refer to Table 6.

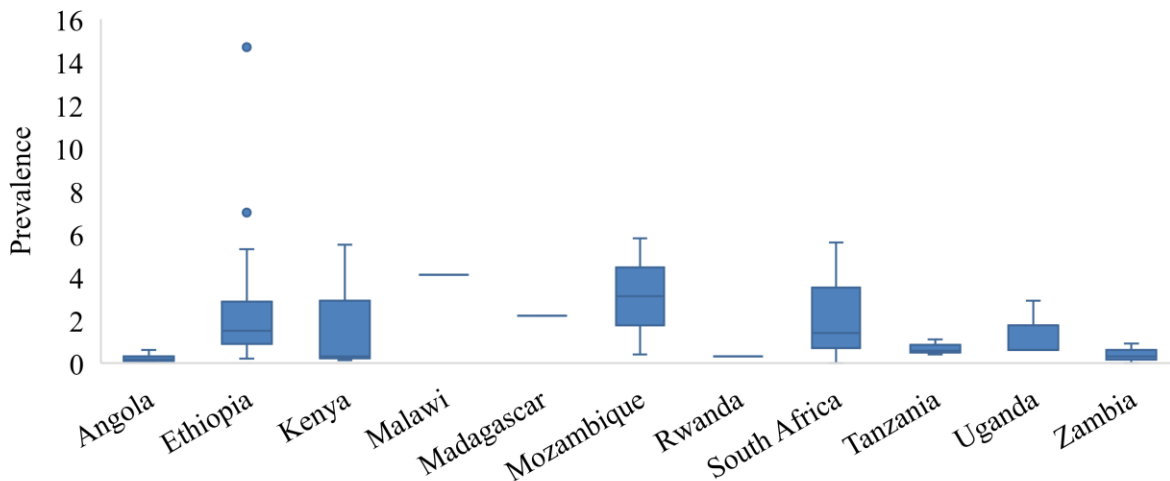

379  
380 **Fig 9. Prevalence of taeniosis in eastern and southern Africa based on microscopy data in**  
381 **reviewed studies**

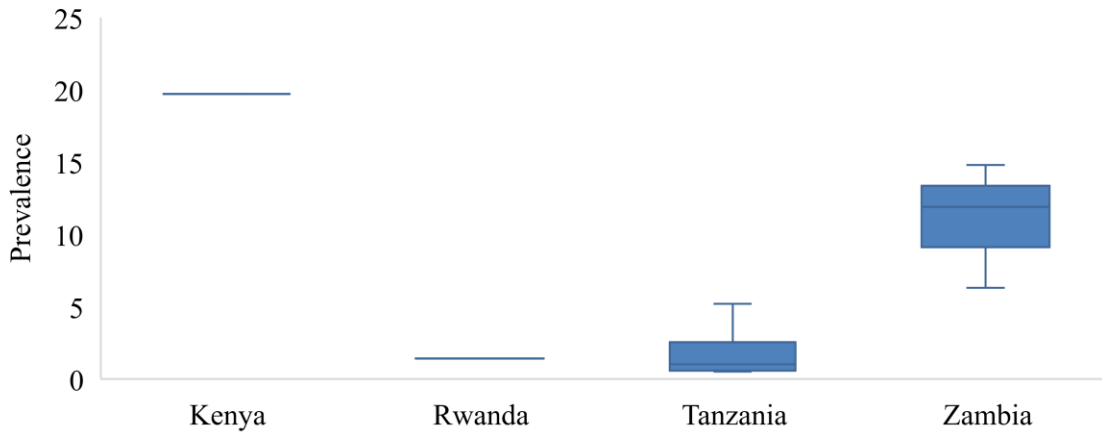

382

383 **Fig 10. Prevalence of taeniosis based on copro-Ag ELISA in reviewed studies in eastern and**  
384 **southern Africa.**

385

386

387

388

389

390

391

392

393

394

395 **Table 6. Aggregated human taeniosis cases detected by stool microscopy and reported as *Taenia spp* in eastern and southern**  
 396 **Africa (2000 - 2022).**

| Country  | No. Tested | Prevalence No (%)                                                                         | Comment                                                                                                                                                                                                                                                                                                       | Reference |
|----------|------------|-------------------------------------------------------------------------------------------|---------------------------------------------------------------------------------------------------------------------------------------------------------------------------------------------------------------------------------------------------------------------------------------------------------------|-----------|
| Angola   | 1237       | 1 (0.1)                                                                                   | A cross-sectional study of 1,237 preschool children (0-5 year olds), 1,142 school-aged children (6-15 year olds) and 960 women (15 year olds) conducted to understand the distribution of malnutrition, anemia, malaria, schistosomiasis (intestinal and urinary) and geohelminths in north-western province. | [95]      |
|          | 1142       | 2 (0.2)                                                                                   |                                                                                                                                                                                                                                                                                                               |           |
|          | 960        | 1 (0.1)                                                                                   |                                                                                                                                                                                                                                                                                                               |           |
|          | 328        | 2. (0.6)                                                                                  | A cross-sectional study conducted among 328 children attending a primary school in Lubango.                                                                                                                                                                                                                   | [96]      |
| Ethiopia | 93         | 4 (4.3)                                                                                   | A cross-sectional study among food handlers in Awassa town.                                                                                                                                                                                                                                                   | [97]      |
|          | 372        | 2 (0.5)                                                                                   | A cross-sectional study among HIV infected and non-infected patients in Jimma zone.                                                                                                                                                                                                                           | [98]      |
|          | 1021       | 14 (1.4)                                                                                  | A cross-sectional community based parasitological survey conducted among population living around the Gilgel Gibe dam catchment areas.                                                                                                                                                                        | [99]      |
|          | 248        | 2 (0.8)                                                                                   | A cross-sectional study among HIV negative subjects in Bahir Dar city.                                                                                                                                                                                                                                        | [100]     |
|          | 459        | 13 (2.8)                                                                                  | A cross-sectional study to assess the magnitude and pattern of intestinal parasitism in lowland (2.8%) and highland (1.2%) dwellers in Gamo area, south Ethiopia.                                                                                                                                             | [101]     |
|          | 399        | 5 (1.2)                                                                                   |                                                                                                                                                                                                                                                                                                               |           |
|          | 399        | 28 (7)                                                                                    | A cross-sectional study to assess prevalence of intestinal parasites infection and associated risk factors among school children in Dagi primary school.                                                                                                                                                      | [102]     |
|          | 343        | 14 (4.1)                                                                                  | A cross-sectional study to determine the prevalence of intestinal parasitic infections in patients living with HIV/AIDS at Hawassa University referral hospital.                                                                                                                                              | [103]     |
|          | 778        | 10 (1.3)                                                                                  | A cross-sectional study among 12 primary schools in Bahir Dar region.                                                                                                                                                                                                                                         | [104]     |
|          | 121        | 5 (4.1)                                                                                   | A cross-sectional study among prison inmates (4.1%) and tobacco farm workers (0.9%) in Northcentral Ethiopia.                                                                                                                                                                                                 | [105]     |
|          | 115        | 1 (0.9)                                                                                   |                                                                                                                                                                                                                                                                                                               |           |
|          | 385        | 6 (1.6)                                                                                   | A cross-sectional study among elementary school children in Sanja, northwest Ethiopia.                                                                                                                                                                                                                        | [106]     |
|          | 415        | 1 (0.2)                                                                                   | A cross-sectional study among TB patients in Gondar hospital.                                                                                                                                                                                                                                                 | [107]     |
| 272      | 1 (0.4)    | A cross-sectional study among food handlers in food establishments at Hassawa University. | [108]                                                                                                                                                                                                                                                                                                         |           |
| 260      | 1 (0.4)    | A cross-sectional study among diarrhea children at Jimma health centre.                   | [109]                                                                                                                                                                                                                                                                                                         |           |

| <b>Country</b> | <b>No.<br/>Tested</b> | <b>Prevalence<br/>No (%)</b> | <b>Comment</b>                                                                                                                                                                                                    | <b>Reference</b> |
|----------------|-----------------------|------------------------------|-------------------------------------------------------------------------------------------------------------------------------------------------------------------------------------------------------------------|------------------|
| Ethiopia       | 400                   | 3 (0.8)                      | A cross-sectional study among children of selected primary schools in Chencha town south Ethiopia.                                                                                                                | [110]            |
|                | 307                   | 4 (1.3)                      | A cross-sectional study among university students at Mekelle University.                                                                                                                                          | [111]            |
|                | 32,191                | 322 (1.0)                    | A retrospective observational study of all stool samples examined for parasites from patients presenting with diarrhea in the period 2007-2012 at Gambo Rural hospital.                                           | [112]            |
|                | 464                   | 4 (0.9)                      | A cross-sectional study among patients attending at Anbesame health center, South Gondar.                                                                                                                         | [113]            |
|                | 374                   | 20 (5.3)                     | A cross-sectional study among school children in Dawro Zone, Southern Ethiopia.                                                                                                                                   | [114]            |
|                | 95                    | 4 (4.2)                      | A cross-sectional study to determine the prevalence of intestinal parasite among HIV/AIDS patients attending ART clinic at Arba Minch hospital southern Ethiopia.                                                 | [115]            |
|                | 345                   | 14 (4.1)                     | A cross-sectional study among food handlers at Arba Minch University student's cafeteria, South Ethiopia.                                                                                                         | [116]            |
|                | 401                   | 2 (0.5)                      | A cross-sectional study among preschool-aged children in Chuahit, Dembia district, Northwest Ethiopia                                                                                                             | [117]            |
|                | 173                   | 4 (2.3)                      | A cross-sectional study among HIV infected individuals in Wolaita Sodo hospital.                                                                                                                                  | [118]            |
|                | 503                   | 13 (2.6)                     | A cross-sectional parasitological and malacological survey among school children in Wolaita zone south Ethiopia.                                                                                                  | [119]            |
|                | 94                    | 2 (2.1)                      | A cross-sectional study among food handlers at cafeteria of Jimma University specialized hospital.                                                                                                                | [120]            |
|                | 427                   | 2 (0.5)                      | A cross-sectional study among patients seen at Adwa health centre North Ethiopia.                                                                                                                                 | [121]            |
|                | 279                   | 2 (2.4)                      | A cross-sectional study among primary school children of Haike primary school Northeast Ethiopia.                                                                                                                 | [122]            |
|                | 256                   | 3 (1.2)                      | A cross-sectional study conducted at University of Gondar hospital to assess the prevalence of intestinal parasites among pulmonary tuberculosis suspected patients.                                              | [123]            |
|                | 213                   | 5 (2.3)                      | A cross-sectional study among TB patients in Arba Minch facility.                                                                                                                                                 | [124]            |
|                | 108                   | 5 (4.6)                      | A cross-sectional study to compare prevalence of intestinal parasites and associated factors among adult pre-ART (4.6%) and on ART (2.0%) patients in Goncha Siso Enesie Woreda, East Gojjam, Northwest Ethiopia. | [125]            |
|                | 204                   | 4 (2.0)                      |                                                                                                                                                                                                                   |                  |

| Country    | No. Tested | Prevalence No (%)       | Comment                                                                                                                                                                                                               | Reference |
|------------|------------|-------------------------|-----------------------------------------------------------------------------------------------------------------------------------------------------------------------------------------------------------------------|-----------|
| Ethiopia   | 280        | 8 (2.9)                 | A cross-sectional study to determine the prevalence of schistosomiasis and other intestinal helminthiasis among school children and free ranging vervet monkeys in Bochessa area, Ziway. Results for school children. | [126]     |
|            | 247        | 1 (0.4)                 | A cross-sectional study to assess intestinal parasitic infections among under-five children attending in Debre Birhan referral hospital, Northeast Ethiopia.                                                          | [127]     |
|            | 391        | 4 (1.0)                 | A cross-sectional study conducted among primary school children in Arbaminch Zuria district.                                                                                                                          | [128]     |
|            | 273        | 6 (2.2)                 | A cross-sectional study among rural school children in Northwest Ethiopia.                                                                                                                                            | [129]     |
|            | 170        | 25 (14.7)               | A cross-sectional study among food handlers at Wolkite University.                                                                                                                                                    | [22]      |
|            | 406        | 12 (3)                  | A cross-sectional study among primary school children in Jawi town, northwest Ethiopia.                                                                                                                               | [130]     |
|            | 200        | 3 (1.5)                 | A cross-sectional study among food handlers at Wollo University Northeastern Ethiopia.                                                                                                                                | [131]     |
|            | 383        | 5 (1.3)                 | A cross-sectional study conducted among Gara Riketa primary school children at Hawassa Tula Sub-City, Southern Ethiopia.                                                                                              | [132]     |
|            | 525        | 11 (2.1)                | A cross-sectional study in three primary schools in Sululta after deworming.                                                                                                                                          | [133]     |
| Kenya      | 797        | 1 (0.13)                | A cross-sectional study to determine a baseline prevalence of IPIs among children of five years and below at Webuye HDSS area in western Kenya.                                                                       | [134]     |
|            | 2113       | 416 (19.7) *<br>6 (0.3) | A cross-sectional survey around the Lake Victoria region to evaluate human and animal zoonotic and non-zoonotic disease in a rural farming community.                                                                 | [23]      |
|            | 310        | 17 (5.5)                | A cross-sectional study among school children in lodwa municipality Turkana county.                                                                                                                                   | [135]     |
| Madagascar | 459        | 10 (2.2) #              | A cross-sectional study aimed at assessing the prevalence of <i>T. Solium</i> infections and associated risk factors in twelve remote villages surrounding Ranomafana national park, Ifanadiana district.             | [21]      |
| Malawi     | 190        | 4 (2.1)                 | A cross-sectional survey among preschool children in Mangochi district.                                                                                                                                               | [136]     |
| Mozambique | 269        | 1 (0.4)                 | A cross-sectional study among children living in urban environs of Maputo and attending the health clinic at xipamanine.                                                                                              | [137]     |
|            | 83,331     | 4833 (5.8)              | A cross-sectional study among school children across the country.                                                                                                                                                     | [138]     |
| Rwanda     | 144        | 2 (1.4) *               | A cross-sectional study conducted in 680 children from a rural primary school in Gakenke district, Northern province to assess the prevalence of <i>T. solium</i> taeniosis cysticercosis.                            | [24]      |

| Country      | No. Tested | Prevalence No (%)                                                                                   | Comment                                                                                                                                                                                                                                                                         | Reference |
|--------------|------------|-----------------------------------------------------------------------------------------------------|---------------------------------------------------------------------------------------------------------------------------------------------------------------------------------------------------------------------------------------------------------------------------------|-----------|
| South Africa | 510        | - (0-1.4)                                                                                           | A cross-sectional study conducted to estimate the prevalence of fecal helminths in a series of rural and urban African school pupils residing at a relatively high altitude above sea level.                                                                                    | [139]     |
|              | 998        | 55 (5.6)                                                                                            | A cross-sectional study to determine the prevalence and risk factors of schistosomiasis and STH infection among preschool aged children aged 15 years in Ngwavuma area of Mkhanyakude district.                                                                                 | [140]     |
| Tanzania     | 820        | 43 (5.2) *<br>34 (4.1) &<br>9 (1.1)                                                                 | A cross-sectional study conducted in Mbozi area of Mbeya district. Of the stool samples testing positive for taeniosis by copro-Ag-ELISA, 34 (4.1%) were Ab positive against adult <i>T. solium</i> . Taenia eggs were detected in 9 (1.1%) stool samples by routine coprology. | [16]      |
|              | 404        | 5 (1.2) &                                                                                           | A cross-sectional study to estimate the prevalence of and factors associated with <i>T. solium</i> infections among HIV+ and HIV - individuals in Mbulu district, northern Tanzania                                                                                             | [86]      |
|              | 1517       | 9 (0.6) *                                                                                           | Taeniosis estimates after 3 rounds of MDA for schistosomiasis in the two regions Mbozi (0.6%) and Mbeya (0.5%).                                                                                                                                                                 | [141]     |
|              | 1501       | 7 (0.5)                                                                                             |                                                                                                                                                                                                                                                                                 |           |
|              | 1514       | 12 (0.8) *                                                                                          | Repeated MDA to school aged children in Mbozi (0.8%) and school aged children in Mbeya (0.5%), Tanzania.                                                                                                                                                                        | [25]      |
|              | 1500       | 8 (0.5)                                                                                             |                                                                                                                                                                                                                                                                                 |           |
| 302          | 5 (1.7) &  | A cross-sectional study to investigate the presence and prevalence of TSTC in PWE in Dar es Salaam. | [87]                                                                                                                                                                                                                                                                            |           |
| Uganda       | 162        | 1 (0.6)                                                                                             | A cross-sectional study among children attending Mwanamugimu nutrition unit of Mulago hospital, Kampala, Uganda.                                                                                                                                                                | [142]     |
|              | 331        | 2 (0.6)                                                                                             | A cross-sectional study among slum dwellers without risk of flooding at least 2 km away from the Nakivubo wetland in Kampala.                                                                                                                                                   | [143]     |
|              | 476        | 14 (2.9)                                                                                            | A cross-sectional study aimed at determining the prevalence and the outcomes (including anaemia) of intestinal parasitic infections and co-infections among children in Kiryandongo refugee camp.                                                                               | [144]     |
| Zambia       | 297        | 1 (0.3)                                                                                             | Prospective study conducted among HIV infected patients in Lusaka.                                                                                                                                                                                                              | [145]     |
|              | 403        | 4 (0.9)                                                                                             | A cross-sectional study to determine the prevalence and intensity of STH infections, intestinal protozoa and the presence of multiple infections in children attending preschool centres in Kafue district Zambia.                                                              | [146]     |

| Country | No. Tested | Prevalence No (%)    | Comment                                                                                                                                            | Reference |
|---------|------------|----------------------|----------------------------------------------------------------------------------------------------------------------------------------------------|-----------|
|         | 718        | 2 (0.3) <sup>#</sup> | A community-based cross-sectional survey to determine the prevalence of human taeniosis and cysticercosis in Petauke district in Eastern province. | [20]      |
|         | 712        | 45 (6.3)*            |                                                                                                                                                    |           |
|         | 226        | 27 (11.9)*           | A prospective study conducted to ascertain the incidence of human cysticercosis in Katete district in Eastern province.                            | [91]      |
|         | 54         | 8 (14.8)*            | A cross-sectional study to assess NCC prevalence among PWE in Katete district in Eastern province.                                                 | [41]      |

397

398 Ag-ELISA, Antigen based ELISA; EITB, Enzyme linked electrotransfer blot; ELISA, Enzyme Linked Immunosorbent Assay; HDSS, Health and demographic  
399 surveillance system; HIV, Human immune deficiency virus; IPIs; Intestinal parasite infections; MDA, Mass drug administration; NCC, Neurocysticercosis; No.,  
400 Number; PWE, People with epilepsy; STH; Soil transmitted helminths; TSTC, *Taenia solium* taeniosis cysticercosis.

401 \*Detection by copro Ag-ELISA.

402 <sup>#</sup>*T. solium* species confirmed.

403 & Detection based on serology using EITB (rES33 immunoblot).

## 404 **Discussion**

405 This study aimed at collecting epidemiological data on *T. solium* infections in humans in the ESA  
406 region for the period 2000 to 2022. For both cysticercosis and taeniosis, there was no data from  
407 Comoros, Djibouti, Eritrea, Mayotte, Reunion, Seychelles, Socotra, Somalia and Somaliland that  
408 could be retrieved. Somalia has for some time now experienced internal conflicts and this may  
409 have a bearing on the diagnosis and reporting of human cysticercosis and taeniosis cases. For the  
410 other six island states and territories, a lack of scientific interest in reporting cases has been cited  
411 [27]. The same can be said about Botswana and Lesotho from which data on cysticercosis and  
412 taeniosis was also lacking. Cysticercosis data was lacking in even more countries.

413 According to the World Bank IBRD-IDA report of 2022 [28] the population using safely managed  
414 sanitation services for both Comoros and Djibouti only stood at 37% with no data for other island  
415 states. People practicing open defecation were higher in Eritrea (67%) with Somalia reporting  
416 (23%) and Djibouti (16%). On the Réunion island, pork is said to be the most popular meat with  
417 a total annual pork consumption of about 20 000 tones. Half of this is produced on the island and  
418 the rest is imported frozen from Europe [29]. Comoros on the other hand has a small livestock  
419 sector with most of its meat including pork imported from Tanzania, Madagascar and France [30].  
420 Seventy per cent of the Somali human population subsists in pastoralism with sheep and goats  
421 being the dominant animals. Camels are primarily raised for milk production and small ruminants  
422 are for generating cash income for the family [31]. For Mayotte, Eritrea and Djibouti, information  
423 on pig rearing could not be found as these countries focus mostly on cattle, sheep, goats, and  
424 camels [32]. However, for Eritrea, pig breeding has recently begun to be promoted [33] and so is  
425 the case for Seychelles whose 2011 census of agriculture showed that 2% (483/24770) of the



426 households were raising pigs in small holdings [34]. Therefore, while it is not possible to ascertain  
427 the presence or absence of human *T. solium* infections in these countries, there is a possibility that  
428 these infections do exist as pork consumption seems to be practiced and risk factors are present;  
429 some countries even import pork from confirmed *T. solium* endemic countries. Therefore, the  
430 numbers collected for this review represent an underestimation of the *T. solium* epidemiology for  
431 human disease in ESA.

432 Regarding human cysticercosis cases, tapeworm carriers are the sole cause of infection in both  
433 rural and urban areas of the ESA region [10,35]. Tapeworm carriers, if not treated, pose a risk to  
434 themselves if they ingest infective eggs leading to cysticercosis but can also pose a risk to other  
435 people in contact [21,36]. A study in Madagascar found at a household level, the overall  
436 seroprevalence of IgG detected by Ab-ELISA and EITB within the same household in which a  
437 tapeworm carrier has been detected was 46% and 34% respectively [21]. Individual human  
438 cysticercosis cases were identified from a third of the 27 ESA countries. South Africa reported the  
439 highest number of individual human cysticercosis cases followed by Madagascar. This could be  
440 due to increased awareness of cysticercosis as a possible diagnosis in, for example, people with  
441 epilepsy in these countries compared to other countries within the region. South Africa also has  
442 more resources compared to the other countries within the region. For example, as early as 2003  
443 South Africa already had 214 CT scans and 111 neurologists. This is an advantage in terms of  
444 diagnosis and management of particularly NCC that is not present in other countries within the  
445 region [37]. With poor pig management, poor meat inspection, and poor sanitation those who do  
446 not eat pork are equally at risk of infection with cysticercosis as those eating pork [38–40].  
447 Additionally, certain cultural practices within the region have also been cited as contributing  
448 factors to cysticercosis. For example, in South Africa, it has been reported that some unqualified

449 traditional healers "baloi" used *Taenia* segments and added them to medicinal mixtures as  
450 strengthening ingredients. There are also reports of *T. solium* segments being added to the beer of  
451 unfaithful husbands or lovers as punishment [37].

452 NCC has been associated with up to 57% of epilepsy cases in sub-Saharan Africa to which the  
453 region under consideration belongs [7,41]. This is higher than the global average of 30% of NCC  
454 among PWE [6]. This association is higher than the global average of 30% [6]. For most countries  
455 within ESA, the diagnosis of NCC is problematic due to the scarcity of neuroimaging, serology  
456 and trained neurologists [42,43]. This diagnostic challenge is not only present in ESA but also in  
457 Europe where a lack of awareness of NCC leads to underdiagnoses [44]. Only a quarter of the  
458 countries within the ESA reported data on NCC and epilepsy. Epilepsy is one of the most common  
459 neurological disorders in many parts of sub-Saharan Africa and NCC seems to be a major cause  
460 of it in *T. solium* cysticercosis endemic areas. Diagnosing NCC among people with epilepsy is  
461 vital to prevent further morbidity and mortality from the disease as well as to reduce the negative  
462 socio-cultural beliefs associated with epilepsy in the region [42,45–47].

463 Regarding human *T. solium* taeniosis in ESA, only Kenya, Madagascar, Rwanda, Tanzania, and  
464 Zambia conducted community-based studies and employed serological tests that specifically  
465 aimed at determining the burden of infection. The other countries reported data on taeniosis as  
466 incidental findings following microscopic examinations of stool samples conducted for soil-  
467 transmitted helminths. The reported human taeniosis cases were also reported on an aggregated  
468 level without evidence of species determination. Thus, cases reported as either taeniosis or *taenia*  
469 *spp* could not for instance be differentiated from cases due to *T. saginata* which is also widely  
470 distributed in ESA [27]. Only two studies, one from Madagascar and another from Zambia were  
471 able to confirm the *T. solium* species after collecting tapeworm proglottids [20,21].

472 This lack of species differentiation creates uncertainty regarding the epidemiology of *T. solium*  
473 infections in ESA. There is therefore a possible underestimation of the magnitude of *T. solium*  
474 taeniosis in the region. This is worsened by the fact that *T. solium* taeniosis is not even a notifiable  
475 disease in most of these countries. Application of molecular methods to differentiate *T. solium*  
476 species on stool examination is not widely practiced and it is difficult to differentiate *taenia* eggs  
477 based on microscopy [35,48]. More sensitive and specific diagnostic tools need to be used to  
478 identify the true prevalence and outline the epidemiology of *T. solium*.

479 Human taeniosis in the region is due to the high prevalence of porcine cysticercosis in ESA  
480 countries which is ranked amongst the highest in the world [10]. Over the last decade, pig  
481 production as a risk factor for human taeniosis in the rural communities of ESA countries has  
482 increased mainly because pig raising is an attractive alternative to other animals as it does not  
483 require grazing land compared to ruminants. Free-range pig keeping is popular, especially in rural  
484 areas of the region as it is easy and cheap. This coupled with the general lack of slaughterhouses  
485 and inspection of pork with a lack of sanitation facilities has contributed to the risk for people to  
486 attract taeniosis and cysticercosis [3,10,49].

## 487 **Study limitation**

488 Our study is limited by the fact that search platforms were used only for online publications. Thus,  
489 unpublished data which could have contributed significantly to a more nuanced picture of the  
490 epidemiology of human *T. solium* infections in ESA could have been missed. Another limitation  
491 of our study is the difficulty in comparing epidemiological data from different study populations  
492 using different diagnostic tests used and the different diagnostic approaches.

## 493 **Conclusion**

494 In this review on human *T. solium* taeniosis and (neuro) cysticercosis within ESA, we found wide  
495 variations in the prevailing prevalent estimates depending on the quality of the study and the  
496 diagnostic methods used. There remain large gaps with regards to *T. solium* infections within the  
497 ESA region with 11 countries without any information on human taeniosis and cysticercosis, and  
498 even more countries (18) without any information for cysticercosis.

499 Considering the public health and economic impact that *T. solium* infections have, it is important  
500 to understand its epidemiology in humans. Human taeniosis, cysticercosis and NCC cases need to  
501 be reported and notified to public health authorities. More community-based surveys as well as  
502 ante-mortem and postmortem porcine surveys must be conducted for control and surveillance  
503 purposes. Lack of awareness about the presence of *T. solium* among medical, community and  
504 government authorities including inadequate technology for diagnosis of taeniosis, cysticercosis  
505 and NCC, in both humans and pigs (cysticercosis) remains a challenge that needs to be addressed  
506 for proper surveillance, prevention and control.

## 507 **Acknowledgment**

508 None.

## 509 **Supplement**

510 **S1 File. Documentation of literature search. (DOCX)**

511 **S2 File. Data collection forms. (DOCX)**

512 **S1 Table. PRISMA 2020 checklist. (DOCX)**

513 **S2 Table. References retrieved through online international databases. (XLS)**

## 514 **Funding**

515 This study was fully funded by the German Federal Ministry of Education and Research (BMBF)  
516 under CYSTINET-Africa 2018-Mar-002 and 01KA1618. The funder had no role in the design of  
517 the study and collection, analysis, and interpretation of data and in writing the manuscript.

## 518 **Availability of data and material**

519 All references found eligible in our review are included in the supplementary materials (S2 Table).

## 520 **Competing interests**

521 The authors declare that they have no competing interests.

## 522 **Author contributions**

523 GZ, CM and HS conducted the systematic review of the literature and extracted data. GZ analysed  
524 the data and drafted the first version of the manuscript. AA, ASW, CM, DS, GZ, IGK, KEM, VS  
525 contributed to the design of the study. All authors contributed to interpretation of data and writing  
526 of the paper. All authors read and approved the final manuscript.

527

528

## 529 **References**

- 530 [1] J. Sotelo, O.H. Del Brutto, Review of neurocysticercosis, *Neurosurg. Focus.* 12 (2002) e1.  
531 <https://doi.org/10.3171/foc.2002.12.6.2>.
- 532 [2] K.D. Murrell, WHO/FAO/OIE guidelines for the surveillance, prevention and control of  
533 taeniosis/cysticercosis. Paris: World Health Organisation for Animal Health (OIE), 2005,  
534 2005. <http://www.oie.int> (accessed May 6, 2019).
- 535 [3] H. Carabin, A. Millogo, A. Cissé, S. Gabriël, I. Sahlou, P. Dorny, C. Bauer, Z. Tarnagda,  
536 L.D. Cowan, R. Ganaba, Prevalence of and Factors Associated with Human Cysticercosis  
537 in 60 Villages in Three Provinces of Burkina Faso, *PLoS Negl. Trop. Dis.* 9 (2015)  
538 e0004248. <https://doi.org/10.1371/journal.pntd.0004248>.
- 539 [4] A. Winkler, H. Richter, Landscape analysis : management of neurocysticercosis with an  
540 emphasis on low- and middle-income countries, *World Heal. Organ.* (2015) 65.  
541 [www.neurokopfzentrum.med.tum.de/neurologie/42b.html](http://www.neurokopfzentrum.med.tum.de/neurologie/42b.html) (accessed February 22, 2018).
- 542 [5] D. Stelzle, V. Schmidt, L. Keller, B.J. Ngowi, W. Matuja, G. Escheu, P. Hauke, V.  
543 Richter, E. Ovuga, B. Pfausler, E. Schmutzhard, A. Amos, W. Harrison, J. Kaducu, A.S.  
544 Winkler, Characteristics of people with epilepsy and Neurocysticercosis in three eastern  
545 African countries—A pooled analysis, *PLoS Negl. Trop. Dis.* 16 (2022) e0010870.  
546 <https://doi.org/10.1371/journal.pntd.0010870>.
- 547 [6] P.C. Ndimubanzi, H. Carabin, C.M. Budke, H. Nguyen, Y.J. Qian, E. Rainwater, M.  
548 Dickey, S. Reynolds, J.A. Stoner, A systematic review of the frequency of  
549 neurocysticercosis with a focus on people with epilepsy, *PLoS Negl. Trop. Dis.* 4 (2010)  
550 e870. <https://doi.org/10.1371/journal.pntd.0000870>.
- 551 [7] L.F. Owolabi, B. Adamu, A.M. Jibo, S.D. Owolabi, A.I. Imam, I.D. Alhaji,  
552 Neurocysticercosis in people with epilepsy in Sub-Saharan Africa: A systematic review  
553 and meta-analysis of the prevalence and strength of association, *Seizure European J.*  
554 *Epilepsy.* 76 (2020) 1–11. <https://doi.org/10.1016/j.seizure.2020.01.005>.
- 555 [8] E. Bruno, A. Bartoloni, L. Zammarchi, M. Strohmeyer, F. Bartalesi, J. Bustos, S.  
556 Santivañez, H.H. Garcia, A. Nicoletti, M. Bonati, F. Severino, V. Confalonieri, C.  
557 Pandolfini, Z. Bisoffi, D. Buonfrate, A. Angheben, M. Albonico, J. Muñoz, R. Pool, A.  
558 Requena-Mendez, M. Roura, A. Hardon, C. Pell, P. Chiodini, J. Moreira, R. Sempértegui,  
559 M. Anselmi, E. Gotuzzo, M.A. Mena, F. Torrico, D. Lozano, G.C. Rojas, T.H. Cabrera,  
560 J.O. Morón, I.A. Cuellar, J.A. Suarez, G. Tognoni, C.L. Caro, Epilepsy and  
561 Neurocysticercosis in Latin America: A Systematic Review and Meta-analysis, *PLoS*  
562 *Negl. Trop. Dis.* 7 (2013). <https://doi.org/10.1371/journal.pntd.0002480>.
- 563 [9] D. Ng-Nguyen, R.J. Traub, V.A.T. Nguyen, K. Breen, M.A. Stevenson, Spatial  
564 distribution of *Taenia solium* exposure in humans and pigs in the Central Highlands of  
565 Vietnam, *PLoS Negl. Trop. Dis.* 12 (2018). <https://doi.org/10.1371/journal.pntd.0006810>.

566

- 567 [10] I.K. Phiri, H. Ngowi, S. Afonso, E. Matenga, M. Boa, S. Mukaratirwa, S. Githigia, M.  
568 Saimo, C. Sikasunge, N. Maingi, G.W. Lubega, A. Kassuku, L. Michael, S. Siziya, R.C.  
569 Krecek, E. Noormahomed, M. Vilhena, P. Dorny, A.L. Willingham, The emergence of  
570 *Taenia solium* cysticercosis in Eastern and Southern Africa as a serious agricultural  
571 problem and public health risk, in: *Acta Trop.*, Elsevier, 2003: pp. 13–23.  
572 [https://doi.org/10.1016/S0001-706X\(03\)00051-2](https://doi.org/10.1016/S0001-706X(03)00051-2).
- 573 [11] M.J. Page, J.E. McKenzie, P.M. Bossuyt, I. Boutron, T.C. Hoffmann, C.D. Mulrow, L.  
574 Shamseer, J.M. Tetzlaff, E.A. Akl, S.E. Brennan, R. Chou, J. Glanville, J.M. Grimshaw,  
575 A. Hróbjartsson, M.M. Lalu, T. Li, E.W. Loder, E. Mayo-Wilson, S. McDonald, L.A.  
576 McGuinness, L.A. Stewart, J. Thomas, A.C. Tricco, V.A. Welch, P. Whiting, D. Moher,  
577 The PRISMA 2020 statement: An updated guideline for reporting systematic reviews,  
578 *BMJ.* 372 (2021). <https://doi.org/10.1136/bmj.n71>.
- 579 [12] M. Viswanathan, A. MT, N. Berkman, S. Chang, L. Hartling, M. et al. McPheeters,  
580 Assessing the risk of bias of individual studies in systematic reviews of health care  
581 interventions - methods guide – chapter | AHRQ effective health care program, (2016).  
582 [www.effectivehealthcare.ahrq.gov](http://www.effectivehealthcare.ahrq.gov). (accessed September 7, 2018).
- 583 [13] M. Mugabe, D. Ruhangaza, E. Hakizimana, Cysticercosis: Report of 10 cases diagnosed at  
584 a district hospital in Rwanda, *Mod. Pathol.* 32 (2019).  
585 [http://ovidsp.ovid.com/ovidweb.cgi?T=JS&PAGE=reference&D=emexb&NEWS=N&AN](http://ovidsp.ovid.com/ovidweb.cgi?T=JS&PAGE=reference&D=emexb&NEWS=N&AN=631814441)  
586 [=631814441](http://ovidsp.ovid.com/ovidweb.cgi?T=JS&PAGE=reference&D=emexb&NEWS=N&AN=631814441).
- 587 [14] S. Sobnach, S.A. Khosa, S. Pather, S. Longhurst, D. Kahn, P.J. Raubenheimer, First case  
588 report of pharyngeal cysticercosis, *Trans. R. Soc. Trop. Med. Hyg.* 103 (2009) 206–208.  
589 <https://doi.org/10.1016/j.trstmh.2008.08.017>.
- 590 [15] C. Himwaze, L.A. Mucheleng’anga, V. Telendiy, A. Hamukale, J. Tembo, N. Kapata, F.  
591 Ntoumi, A. Zumla, Cardiac cysticercosis and neurocysticercosis in sudden and unexpected  
592 community deaths in Lusaka, Zambia: a descriptive medico-legal post-mortem  
593 examination study, *Int. J. Infect. Dis.* 115 (2022) 195–200.  
594 <https://doi.org/10.1016/j.ijid.2021.11.042>.
- 595 [16] G. Mwanjali, C. Kihamia, D.V.C. Kakoko, F. Lekule, H. Ngowi, M.V. Johansen, S.M.  
596 Thamsborg, A.L. Willingham, Prevalence and Risk Factors Associated with Human  
597 *Taenia Solium* Infections in Mbozi District, Mbeya Region, Tanzania, *PLoS Negl. Trop.*  
598 *Dis.* 7 (2013) e2102. <https://doi.org/10.1371/journal.pntd.0002102>.
- 599 [17] A. Buda, O. Dean, H.R. Adams, S. Mwanza-Kabaghe, M.J. Potchen, E.G. Mbewe, P.P.  
600 Kabundula, S.M. Moghaddam, M. Mweemba, B. Matoka, M.M. Mathews, G.L. Birbeck,  
601 D.R. Bearden, Neurocysticercosis Among Zambian Children and Adolescents With  
602 Human Immunodeficiency Virus: A Geographic Information Systems Approach, *Pediatr.*  
603 *Neurol.* 102 (2020) 36–43. <https://doi.org/10.1016/j.pediatrneurol.2019.07.017>.
- 604 [18] M.M. Diaz, D. Sokhi, J. Noh, A.K. Ngugi, F.J. Minja, P. Reddi, E.M. Fèvre, A.-C.L.  
605 Meyer, Prevalence of Epilepsy, Human Cysticercosis, and Porcine Cysticercosis in  
606 Western Kenya, *Am. J. Trop. Med. Hyg.* 106 (2022) 1450–1455.



- 607 <https://doi.org/10.4269/ajtmh.21-0594>.
- 608 [19] G.S. Ocana, J.C.O. Sablon, I.O. Tamayo, L.A. Arena, L.M.S. Ocana, S. Govender,  
609 Neurocysticercosis in patients presenting with epilepsy at St. Elizabeth’s Hospital,  
610 Lusikisiki, South African Med. J. 99 (2009) 588–591. <https://doi.org/10.7196/SAMJ.3358>.
- 611 [20] K.E. Mwape, I.K. Phiri, N. Praet, J.B. Muma, G. Zulu, P. van den Bossche, R. de Deken,  
612 N. Speybroeck, P. Dorny, S. Gabriël, Taenia solium infections in a rural area of Eastern  
613 Zambia-A community based study, PLoS Negl. Trop. Dis. 6 (2012) 1–9.  
614 <https://doi.org/10.1371/journal.pntd.0001594>.
- 615 [21] A. Rahantamalala, R.L. Rakotoarison, E. Rakotomalala, M. Rakotondrazaka, J. Kiernan,  
616 P.M. Castle, L. Hakami, K. Choi, A.S. Rafalimanantsoa, A. Harimanana, P. Wright, S.G.  
617 Lapierre, M. Schoenhals, P.M. Small, L.A. Marcos, I. Vigan-Womas, Prevalence and  
618 factors associated with human Taenia solium taeniosis and cysticercosis in twelve remote  
619 villages of Ranomafana rainforest, Madagascar, PLoS Negl. Trop. Dis. 16 (2022)  
620 e0010265. <https://doi.org/10.1371/journal.pntd.0010265>.
- 621 [22] T.A. Bafa, E.M. Sherif, A.H. Hantalo, G.G. Woldeamanuel, Magnitude of  
622 enteropathogens and associated factors among apparently healthy food handlers at  
623 Wolkite University Student’s Cafeteria, Southern Ethiopia, BMC Res. Notes. 12 (2019)  
624 1–6. <https://doi.org/10.1186/s13104-019-4599-z>.
- 625 [23] E.M. Fèvre, W.A. de Glanville, L.F. Thomas, E.A.J. Cook, S. Kariuki, C.N. Wamae, An  
626 integrated study of human and animal infectious disease in the Lake Victoria crescent  
627 small-holder crop-livestock production system, Kenya, BMC Infect. Dis. 17 (2017) 1–14.  
628 <https://doi.org/10.1186/s12879-017-2559-6>.
- 629 [24] L. Acosta Soto, L.A. Parker, M.J. Irisarri-Gutiérrez, J.A. Bustos, Y. Castillo, E. Perez, C.  
630 Muñoz-Antoli, J.G. Esteban, H.H. García, F.J. Bornay-Llinares, Evidence for  
631 Transmission of Taenia solium Taeniasis/Cysticercosis in a Rural Area of Northern  
632 Rwanda, Front. Vet. Sci. 8 (2021) 237. <https://doi.org/10.3389/fvets.2021.645076>.
- 633 [25] U.C. Braae, P. Magnussen, B. Ndawi, W. Harrison, F. Lekule, M.V. Johansen, Effect of  
634 repeated mass drug administration with praziquantel and track and treat of taeniosis cases  
635 on the prevalence of taeniosis in Taenia solium endemic rural communities of Tanzania,  
636 Acta Trop. 165 (2017) 246–251. <https://doi.org/10.1016/j.actatropica.2015.10.012>.
- 637 [26] K.E. Mwape, I.K. Phiri, N. Praet, P. Dorny, J.B. Muma, G. Zulu, N. Speybroeck, S.  
638 Gabriël, Study and ranking of determinants of taenia solium infections by classification  
639 tree models, Am. J. Trop. Med. Hyg. 92 (2015) 56–63. <https://doi.org/10.4269/ajtmh.13-0593>.
- 641 [27] V. Dermauw, P. Dorny, U.C. Braae, B. Devleeschauwer, L.J. Robertson, A. Saratsis, L.F.  
642 Thomas, Epidemiology of Taenia saginata taeniosis/cysticercosis: A systematic review of  
643 the distribution in southern and eastern Africa, Parasites and Vectors. 11 (2018) 578.  
644 <https://doi.org/10.1186/s13071-018-3163-3>.



- 645 [28] The World Bank IBRD-IDA, Countries | Data, (2022). <https://data.worldbank.org/country>  
646 (accessed November 17, 2022).
- 647 [29] L. Phillips, Successful meat production on Réunion Island, Farmer's Wkly. (2014).  
648 [https://www.farmersweekly.co.za/animals/cattle/successful-meat-production-on-reunion-](https://www.farmersweekly.co.za/animals/cattle/successful-meat-production-on-reunion-island/)  
649 [island/](https://www.farmersweekly.co.za/animals/cattle/successful-meat-production-on-reunion-island/) (accessed September 27, 2022).
- 650 [30] H.C. Metz, Comoros: A Country Study, Washingt. GPO Libr. Congr. (1994).  
651 <http://countrystudies.us/comoros/> (accessed September 27, 2022).
- 652 [31] A.A. Elmi, Livestock production in Somalia with special emphasis on camels, Nomad.  
653 People. 29 (1991) 87–103. <https://www.jstor.org/stable/43123342> (accessed November  
654 17, 2022).
- 655 [32] EAFF 2022, East Africa Farmers Federation, (n.d.). <https://www.eaffu.org/djibouti/>  
656 (accessed September 23, 2022).
- 657 [33] Eritrea Ministry of Information, Livestock Population and Types, (2012).  
658 <https://shabait.com/2012/12/24/livestock-population-and-types-of-eritrea/> (accessed  
659 September 27, 2022).
- 660 [34] Mr Marc Naiken; Ms. Laura Ah Time, Seychelles Census of Agriculture, (2011).  
661 <https://wedocs.unep.org/xmlui/handle/20.500.11822/9520> (accessed November 17, 2022).
- 662 [35] K.E. Mwape, S. Gabriël, The Parasitological, Immunological, and Molecular Diagnosis of  
663 Human Taeniasis with Special Emphasis on Taenia solium Taeniasis, Curr. Trop. Med.  
664 Reports. 1 (2014) 173–180. <https://doi.org/10.1007/s40475-014-0028-5>.
- 665 [36] H.H. Garcia, O.H. Del Brutto, Neurocysticercosis: Updated concepts about an old disease,  
666 Lancet Neurol. 4 (2005) 653–661. [https://doi.org/10.1016/S1474-4422\(05\)70194-0](https://doi.org/10.1016/S1474-4422(05)70194-0).
- 667 [37] N.A. Mafojane, C.C. Appleton, R.C. Krecek, L.M. Michael, A.L. Willingham, The current  
668 status of neurocysticercosis in Eastern and Southern Africa, in: Acta Trop., Elsevier, 2003:  
669 pp. 25–33. [https://doi.org/10.1016/S0001-706X\(03\)00052-4](https://doi.org/10.1016/S0001-706X(03)00052-4).
- 670 [38] H.J. Heinz, G.M. Macnab, Cysticercosis in the Bantu of southern Africa., S. Afr. J. Med.  
671 Sci. 30 (1965) 19–31. <https://pubmed.ncbi.nlm.nih.gov/5854976/> (accessed May 15,  
672 2022).
- 673 [39] I.K. Phiri, P. Dorny, S. Gabriel, A.L. Willingham, N. Speybroeck, J. Vercruysse, The  
674 prevalence of porcine cysticercosis in Eastern and Southern provinces of Zambia, Vet.  
675 Parasitol. 108 (2002) 31–39. [https://doi.org/10.1016/S0304-4017\(02\)00165-6](https://doi.org/10.1016/S0304-4017(02)00165-6).
- 676 [40] F. Jansen, P. Dorny, S. Gabriël, V. Dermauw, M.V. Johansen, C. Trevisan, The survival  
677 and dispersal of Taenia eggs in the environment: what are the implications for  
678 transmission? A systematic review, Parasites and Vectors. 14 (2021) 1–16.  
679 <https://doi.org/10.1186/s13071-021-04589-6>.

- 680 [41] K.E. Mwape, J. Blocher, J. Wiefek, K. Schmidt, P. Dorny, N. Praet, C. Chiluba, H.  
681 Schmidt, I.K. Phiri, A.S. Winkler, S. Gabriël, Prevalence of neurocysticercosis in people  
682 with epilepsy in the Eastern province of Zambia, *PLoS Negl. Trop. Dis.* 9 (2015)  
683 e0003972. <https://doi.org/10.1371/journal.pntd.0003972>.
- 684 [42] A. Winkler, S. Sylvia, Epilepsy and Neurocysticercosis in Sub-Saharan Africa, *Nov. Asp.*  
685 *Cysticercosis Neurocysticercosis.* (2013). <https://doi.org/10.5772/53289>.
- 686 [43] A. Millogo, A. Kongnyu Njamnshi, M. Kabwa-PierreLuabeya, Neurocysticercosis and  
687 epilepsy in sub-Saharan Africa, *Brain Res. Bull.* 145 (2019) 30–38.  
688 <https://doi.org/10.1016/j.brainresbull.2018.08.011>.
- 689 [44] M. Laranjo-González, B. Devleeschauwer, C. Trevisan, A. Allepuz, S. Sotiraki, A.  
690 Abraham, M.B. Afonso, J. Blocher, L. Cardoso, J.M. Correia Da Costa, P. Dorny, S.  
691 Gabriël, J. Gomes, M.Á. Gómez-Morales, P. Jokelainen, M. Kaminski, B. Krt, P.  
692 Magnussen, L.J. Robertson, V. Schmidt, E. Schmutzhard, G.S.A. Smit, B. Šoba, C.R.  
693 Stensvold, J. Starič, K. Troell, A.V. Rataj, M. Vieira-Pinto, M. Vilhena, N.A. Wardrop,  
694 A.S. Winkler, V. Dermauw, Epidemiology of taeniosis/cysticercosis in Europe, a  
695 systematic review: Western Europe, *Parasites and Vectors.* 10 (2017) 1–14.  
696 <https://doi.org/10.1186/s13071-017-2280-8>.
- 697 [45] R. Baskind, G.L. Birbeck, Epilepsy-associated stigma in sub-Saharan Africa: The social  
698 landscape of a disease, *Epilepsy Behav.* 7 (2005) 68–73.  
699 <https://doi.org/10.1016/J.YEBEH.2005.04.009>.
- 700 [46] M. Atadzhanov, A. Haworth, E.N. Chomba, E.K. Mbewe, G.L. Birbeck, Epilepsy-  
701 associated stigma in Zambia: what factors predict greater felt stigma in a highly  
702 stigmatized population?, *Epilepsy Behav.* 19 (2010) 414–8.  
703 <https://doi.org/10.1016/j.yebbeh.2010.08.017>.
- 704 [47] M.T. Medina, R.L. Aguilar-Estrada, A. Alvarez, R.M. Durón, L. Martínez, S. Dubón, A.L.  
705 Estrada, C. Zúniga, D. Cartagena, A. Thompson, E. Ramirez, L. Banegas, J.R. Osorio, A.  
706 V. Delgado-Escueta, J.S. Collins, K.R. Holden, Reduction in rate of epilepsy from  
707 neurocysticercosis by community interventions: The Salamá, Honduras study, *Epilepsia.*  
708 52 (2011) 1177–1185. <https://doi.org/10.1111/j.1528-1167.2010.02945.x>.
- 709 [48] J.S. McCarthy, S. Lustigman, G.J. Yang, R.M. Barakat, H.H. García, B. Sripa, A.L.  
710 Willingham, R.K. Prichard, M.G. Basáñez, A research agenda for helminth diseases of  
711 humans: Diagnostics for control and elimination programmes, *PLoS Negl. Trop. Dis.* 6  
712 (2012). <https://doi.org/10.1371/journal.pntd.0001601>.
- 713 [49] S. Thys, K.E. Mwape, P. Lefèvre, P. Dorny, T. Marcotty, A.M. Phiri, I.K. Phiri, S.  
714 Gabriël, Why Latrines Are Not Used: Communities' Perceptions and Practices Regarding  
715 Latrines in a *Taenia solium* Endemic Rural Area in Eastern Zambia, *PLoS Negl. Trop.*  
716 *Dis.* 9 (2015) e0003570. <https://doi.org/10.1371/journal.pntd.0003570>.
- 717 [50] F.R. Rabenjaminina, J. Ranaivoravo, V. Raholimina, A. Ramialiharisoa, A case report of  
718 bronchial cysticercosis, *Arch. Inst. Pasteur Madagascar.* 66 (2000) 43–45.

- 719 <https://europepmc.org/article/med/12463034> (accessed October 23, 2021).
- 720 [51] H.N. Rakoto-Ratsimba, S.S.E.N. Rabesalama, H.J.C. Razafimahandry, A. Ranaivozanany,  
721 Case report of solitary breast cysticercosis in Madagascar, *Med. Trop.* 67 (2007) 179–180.  
722 <https://pubmed.ncbi.nlm.nih.gov/17691439/> (accessed October 18, 2021).
- 723 [52] T. Heller, C. Wallrauch, D. Kaminstein, S. Phiri, Case report: Cysticercosis: sonographic  
724 diagnosis of a treatable cause of epilepsy and skin nodules, *Am. J. Trop. Med. Hyg.* 97  
725 (2017) 1827–1829. <https://doi.org/10.4269/ajtmh.17-0257>.
- 726 [53] S.J. Uledi, A rare gigantic solitary cysticercosis pseudotumour of the neck, *J. Surg. Case*  
727 *Reports.* 2010 (2010) 5–5. <https://doi.org/10.1093/jscr/2010.9.5>.
- 728 [54] S. Agnihotri, O.P. Talwar, S. Pudasaini, R. Baral, Cysticercosis of breast - A case report,  
729 *Polish J. Pathol.* 57 (2006) 53–54. <https://doi.org/10.3348/jkrs.1995.32.5.835>.
- 730 [55] J. Tuan, L. Kailani, P. Ngabitsinze, S. Umuganwa, F. Munyaneza, E. Musoni, A.L.  
731 Canales, M. Nkeshimana, Disseminated cysticercosis in rwanda—case report of a patient  
732 presenting with difficulty with walking and skin nodules, *Rwanda Med. J.* 77 (2020) 1–4.  
733 [https://www.google.com/search?q=Disseminated+cysticercosis+in+rwanda—  
734 case+report+of+a+patient+presenting+with+difficulty+with+walking+and+skin+nodules  
735 &oq=Disseminated+cysticercosis+in+rwanda—  
736 case+report+of+a+patient+presenting+with+difficulty+with+walking](https://www.google.com/search?q=Disseminated+cysticercosis+in+rwanda—case+report+of+a+patient+presenting+with+difficulty+with+walking+and+skin+nodules&oq=Disseminated+cysticercosis+in+rwanda—case+report+of+a+patient+presenting+with+difficulty+with+walking) (accessed July 5,  
737 2022).
- 738 [56] M.B. Thomas, K.M. Thomas, A.A. Awotedu, E. Blanco-Blanco, M. Anwary,  
739 *Cardiocysticercosis*, *SAMJ South African Med. J.* 97 (2007) 504–506.  
740 [https://go.gale.com/ps/i.do?p=AONE&sw=w&issn=02569574&v=2.1&it=r&id=GALE%  
741 7CA167881603&sid=googleScholar&linkaccess=fulltext](https://go.gale.com/ps/i.do?p=AONE&sw=w&issn=02569574&v=2.1&it=r&id=GALE%7CA167881603&sid=googleScholar&linkaccess=fulltext) (accessed October 24, 2021).
- 742 [57] E. Agaba, D. Modi, O. Gunduz, Z. Modi, Subcutaneous nodules of cysticercosis as a sign  
743 of asymptomatic neurocysticercosis in an HIV positive patient, *Rev. Soc. Bras. Med.*  
744 *Trop.* 51 (2018) 861–863. <https://doi.org/10.1590/0037-8682-0178-2018>.
- 745 [58] Z. Nowalaza, M. Zampoli, K. Pillay, S. Singh, H.J. Zar, Pulmonary cysticercosis in an  
746 urban South African child, *Pediatr. Pulmonol.* 56 (2021) 4060–4062.  
747 <https://doi.org/10.1002/ppul.25682>.
- 748 [59] D.W. McCormick, J.M. Bacha, N.K. El-Mallawany, C.L. Kovarik, J.S. Slone, L.R.  
749 Campbell, Disseminated cysticercosis and Kaposi sarcoma in a child with HIV/AIDS: A  
750 case report, *BMC Infect. Dis.* 20 (2020) 1–5. <https://doi.org/10.1186/s12879-020-05039-x>.
- 751 [60] F.R. Lyimo, A.M. Jusabani, H. Makungu, M. Mtolera, S. Surani, Thinking Outside  
752 Malaria: A Rare Case of Disseminated Cysticercosis With Cardiopulmonary Involvement  
753 From Urban Tanzania, *Cureus.* 13 (2021). <https://doi.org/10.7759/cureus.12851>.
- 754 [61] P. Rajaonarison, S. Ralamboson, C. Andriamamonjy, R. Ramanampamonjy, R. Ce, F.  
755 Razafindratriho, R. Villeneuve, A. Andriantsimahavandy, *Diagnostic de la*

- 756 neurocysticercose : à propos d ' un cas, Arch. Inst. Pasteur Madagascar. 67 (2001) 53–56.  
757 [https://www.researchgate.net/publication/237675160\\_Diagnostic\\_de\\_la\\_neurocysticercos](https://www.researchgate.net/publication/237675160_Diagnostic_de_la_neurocysticercose_a_propos_d'un_cas)  
758 [e\\_a\\_propos\\_d'un\\_cas](https://www.researchgate.net/publication/237675160_Diagnostic_de_la_neurocysticercose_a_propos_d'un_cas) (accessed October 23, 2021).
- 759 [62] R.A. Rakotoarivelo, R.L. Andrianasolo, D. Ranoharison, R.O.S. Rakoto, F.A. Sendrasoa,  
760 M.J. de Dieu Randria, Neurocysticercosis as an important differential of paradoxical  
761 response during antituberculosis therapy in HIV-negative patient, Asian Pacific J. Trop.  
762 Dis. 1 (2011) 333–334. [https://doi.org/10.1016/S2222-1808\(11\)60077-7](https://doi.org/10.1016/S2222-1808(11)60077-7).
- 763 [63] N. Kalata, J. Ellis, L. Benjamin, S. Kampondeni, P. Chiodini, T. Harrison, D.G. Lalloo,  
764 R.S. Heyderman, Neurological deterioration in a patient with HIV-associated cryptococcal  
765 meningitis initially improving on antifungal treatment: a case report of coincidental  
766 racemose neurocysticercosis, BMC Infect. Dis. 21 (2021) 1–5.  
767 <https://doi.org/10.1186/s12879-021-06425-9>.
- 768 [64] V. Saldanha, G. Saldanha, R.P. Reys, C.A. Benson, E.V. Noormahomed,  
769 Neurocysticercosis in Child Bearing Women: An Overlooked Condition in Mozambique  
770 and a Potentially Missed Diagnosis in Women Presenting with Eclampsia., EC Microbiol.  
771 14 (2018) 736–740.  
772 <http://www.ncbi.nlm.nih.gov/pubmed/31681909>[http://www.pubmedcentral.nih.gov/a](http://www.pubmedcentral.nih.gov/articlerender.fcgi?artid=PMC6824723)  
773 [rticlerender.fcgi?artid=PMC6824723](http://www.pubmedcentral.nih.gov/articlerender.fcgi?artid=PMC6824723) (accessed July 5, 2022).
- 774 [65] A.M. Vitali, R. Jithoo, Multiple forms of neurocysticercosis in a single patient, Br. J.  
775 Neurosurg. 18 (2004) 650–651. <https://doi.org/10.1080/02688690400022847>.
- 776 [66] T. Motsepe, D. Ackerman, Spinal and vertebral neurocysticercosis in an HIV-positive  
777 female patient, South. African J. Epidemiol. Infect. 27 (2012) 133–136.  
778 <https://doi.org/10.1080/10158782.2012.11441499>.
- 779 [67] K. Jivan, A. Mochan, G. Modi, Intraventricular neurocysticercosis causing acute unilateral  
780 hydrocephalus, African J. Psychiatry (South Africa). 13 (2010) 315–317.  
781 [https://www.researchgate.net/publication/47460261\\_Intraventricular\\_neurocysticercosis\\_c](https://www.researchgate.net/publication/47460261_Intraventricular_neurocysticercosis_causing_acute_unilateral_hydrocephalus)  
782 [ausing\\_acute\\_unilateral\\_hydrocephalus](https://www.researchgate.net/publication/47460261_Intraventricular_neurocysticercosis_causing_acute_unilateral_hydrocephalus) (accessed October 22, 2021).
- 783 [68] H.F. Sibat, Neurocysticercosis, Epilepsy, COVID-19 and a Novel Hypothesis: Cases  
784 Series and Systematic Review, Clin. Schizophr. Relat. Psychoses. 15 (2021).  
785 <https://doi.org/10.3371/CSRP.FH.121421>.
- 786 [69] B. Ndlovu, Combined surgical and medical treatment of racemose neurocysticercosis in  
787 Swaziland, Neuroradiology. 60 (2018) 109–110.  
788 [https://www.embase.com/search/results?subaction=viewrecord&id=L621458617&from=](https://www.embase.com/search/results?subaction=viewrecord&id=L621458617&from=export)  
789 [xport](https://www.embase.com/search/results?subaction=viewrecord&id=L621458617&from=export).
- 790 [70] F. Mukonde, Abstracts, Epilepsia. 55 (2014) 4–246. <https://doi.org/10.1111/epi.12675>.
- 791 [71] J. Manske, C. McVey, H. Chengazi, O. Siddiqi, D. Saylor, Intramedullary spinal  
792 neurocysticercosis (P5.9-031), Neurology. 92 (2019).

- 793 [72] A. Musara, N. Soko, S. Shamu, Suprasellar cysticercosis cyst with optic nerve  
794 compression masquerading as an arachnoid cyst, *Middle East Afr. J. Ophthalmol.* 26  
795 (2019) 114–116. [https://doi.org/10.4103/meajo.MEAJO\\_142\\_18](https://doi.org/10.4103/meajo.MEAJO_142_18).
- 796 [73] G. Nsengiyumva, M. Druet-Cabanac, B. Ramanankandrasana, B. Bouteille, L. Nsizabira,  
797 P.M. Preux, Cysticercosis as a major risk factor for epilepsy in Burundi, East Africa,  
798 *Epilepsia.* 44 (2003) 950–955. <https://doi.org/10.1046/j.1528-1157.2003.55302.x>.
- 799 [74] P. Leutscher, A. Andriantsimahavandy, Cysticercosis in Peace Corps Volunteers in  
800 Madagascar, *N. Engl. J. Med.* 350 (2004) 311–312.  
801 <https://doi.org/10.1056/nejm200401153500325>.
- 802 [75] J.. Carod, J. Razafimahefa, M. Randrianarison, R.. Ramahefarisoa, M. Rakotondrazaka,  
803 M. Andriantseheno, The burden of neurocysticercosis: A multi-purpose survey in  
804 Madagascar, *Clin. Microbiol. Infect.* 18 (2012) 52–53.  
805 [http://ovidsp.ovid.com/ovidweb.cgi?T=JS&PAGE=reference&D=emed10&NEWS=N&A](http://ovidsp.ovid.com/ovidweb.cgi?T=JS&PAGE=reference&D=emed10&NEWS=N&AN=70822228)  
806 [N=70822228](http://ovidsp.ovid.com/ovidweb.cgi?T=JS&PAGE=reference&D=emed10&NEWS=N&AN=70822228) (accessed July 8, 2022).
- 807 [76] J.. Carod, M. Rakotondrazaka, R.. Ramahefarisoa, D. Menard, J.. Soares, P. Dorny, P.  
808 Wilkins, Updated epidemiology of cysticercosis in Madagascar, *Trop. Med. Int. Heal.* 16  
809 (2011) 270.  
810 [http://ovidsp.ovid.com/ovidweb.cgi?T=JS&PAGE=reference&D=emed10&NEWS=N&A](http://ovidsp.ovid.com/ovidweb.cgi?T=JS&PAGE=reference&D=emed10&NEWS=N&AN=70589687)  
811 [N=70589687](http://ovidsp.ovid.com/ovidweb.cgi?T=JS&PAGE=reference&D=emed10&NEWS=N&AN=70589687) (accessed July 9, 2022).
- 812 [77] M.L. Rakotomahefa Narison, A.B.A. Ratsimbazafy, H. Randrianjafinimpanana, N.  
813 Randrianaivo, T.N. Andriatahina, H.S. Raobijaona, Aspect épidémio-clinique de la  
814 neurocysticercose dans le service de pédiatrie au CHU de Tamatave- Madagascar, *Arch.*  
815 *Pediatr.* 21 (2014) 810. [https://doi.org/10.1016/S0929-693X\(14\)72070-6](https://doi.org/10.1016/S0929-693X(14)72070-6).
- 816 [78] N.J. Zafindraibe, J. Ralalarinivo, A.I. Rakotoniaina, M.N. Maeder, M.R. Andrianarivelo,  
817 B. Contamin, A. Michault, A. Rasamindrakotroka, Séroprévalence de la cysticercose et  
818 facteurs de risque associés chez un groupe de patients vus au centre hospitalier régional de  
819 référence d’antsirabe, madagascar, *Pan Afr. Med. J.* 28 (2017).  
820 <https://doi.org/10.11604/pamj.2017.28.260.10463>.
- 821 [79] J.F. Carod, P. Dorny, Cysticercosis in Madagascar, *J. Infect. Dev. Ctries.* 14 (2020) 1031–  
822 1042. <https://doi.org/10.3855/JIDC.13450>.
- 823 [80] Y.A. Assane, C. Trevisan, C.M. Schutte, E.V. Noormahomed, M.V. Johansen, P.  
824 Magnussen, Neurocysticercosis in a rural population with extensive pig production in  
825 Angónia district, Tete Province, Mozambique, *Acta Trop.* 165 (2017) 155–160.  
826 <https://doi.org/10.1016/j.actatropica.2015.10.018>.
- 827 [81] E.V. Noormahomed, N. Nhacupe, C. Mascaró-Lazcano, M.N. Mauaie, T. Buene, C.A.  
828 Funzamo, C.A. Benson, A Cross-sectional Serological Study of Cysticercosis,  
829 Schistosomiasis, Toxocariasis and Echinococcosis in HIV-1 Infected People in Beira,  
830 Mozambique, *PLoS Negl. Trop. Dis.* 8 (2014) e3121.  
831 <https://doi.org/10.1371/journal.pntd.0003121>.



- 832 [82] R. Rottbeck, J.F. Nshimiyimana, P. Tugirimana, U.E. Düll, J. Sattler, J.C. Hategekimana,  
833 J. Hitayezu, I. Bruckmaier, M. Borchert, J.B. Gahutu, S. Dieckmann, G. Harms, F.P.  
834 Mockenhaupt, R. Ignatius, High Prevalence of Cysticercosis in People with Epilepsy in  
835 Southern Rwanda, *PLoS Negl. Trop. Dis.* 7 (2013).  
836 <https://doi.org/10.1371/journal.pntd.0002558>.
- 837 [83] H. Foyaca-Sibat, L.D. Cowan, H. Carabin, I. Targonska, M.A. Anwary, G. Serrano-  
838 Ocaña, R.C. Krecek, A.L. Willingham, Accuracy of serological testing for the diagnosis  
839 of prevalent neurocysticercosis in outpatients with epilepsy, Eastern Cape Province, South  
840 Africa, *PLoS Negl. Trop. Dis.* 3 (2009) e562.  
841 <https://doi.org/10.1371/journal.pntd.0000562>.
- 842 [84] A.S. Winkler, J. Blocher, H. Auer, T. Gotwald, W. Matuja, E. Schmutzhard, Epilepsy and  
843 neurocysticercosis in rural Tanzania - An imaging study, *Epilepsia.* 50 (2009) 987–993.  
844 <https://doi.org/10.1111/j.1528-1167.2008.01867.x>.
- 845 [85] E. Hunter, K. Burton, A. Iqbal, D. Birchall, M. Jackson, J. Rogathe, A. Jusabani, W. Gray,  
846 E. Aris, G. Kamuyu, P.P. Wilkins, C.R. Newton, R. Walker, Cysticercosis and epilepsy in  
847 rural Tanzania: A community-based case-control and imaging study, *Trop. Med. Int. Heal.*  
848 20 (2015) 1171–1179. <https://doi.org/10.1111/tmi.12529>.
- 849 [86] V. Schmidt, C. Kositz, K.H. Herbinger, H. Carabin, B. Ngowi, E. Naman, P.P. Wilkins, J.  
850 Noh, W. Matuja, A.S. Winkler, Association between *Taenia solium* infection and  
851 HIV/AIDS in northern Tanzania: A matched cross sectional-study, *Infect. Dis. Poverty.* 5  
852 (2016). <https://doi.org/10.1186/s40249-016-0209-7>.
- 853 [87] V. Schmidt, M.C. O'Hara, B. Ngowi, K.H. Herbinger, J. Noh, P.P. Wilkins, V. Richter, C.  
854 Kositz, W. Matuja, A.S. Winkler, *Taenia solium* cysticercosis and taeniasis in urban  
855 settings: Epidemiological evidence from a health-center based study among people with  
856 epilepsy in Dar es Salaam, Tanzania, *PLoS Negl. Trop. Dis.* 13 (2019) e0007751.  
857 <https://doi.org/10.1371/journal.pntd.0007751>.
- 858 [88] J.O. Mageto, C.I. Muleke, C.R. Newton, G. Samuel, Multiple parasitic infections as risk  
859 factors of active convulsive epilepsy., *Sch. J. Appl. Med. Sci.* 3 (2015) 178–184.  
860 <http://saspublisher.com/wp-content/uploads/2015/01/SJAMS-31C178-184.pdf>.
- 861 [89] B.J. Mwang'Onde, M.J. Chacha, G. Nkwengulila, The status and health burden of  
862 neurocysticercosis in Mbulu district, northern Tanzania, *BMC Res. Notes.* 11 (2018) 1–5.  
863 <https://doi.org/10.1186/s13104-018-3999-9>.
- 864 [90] G. Kamuyu, C. Bottomley, J. Mageto, B. Lowe, P.P. Wilkins, J.C. Noh, T.B. Nutman,  
865 A.K. Ngugi, R. Odhiambo, R.G. Wagner, A. Kakooza-Mwesige, S. Owusu-Agyei, K. Ae-  
866 Ngibise, H. Masanja, F.H.A. Osier, P. Odermatt, C.R. Newton, Exposure to Multiple  
867 Parasites Is Associated with the Prevalence of Active Convulsive Epilepsy in Sub-Saharan  
868 Africa, *PLoS Negl. Trop. Dis.* 8 (2014) e2908.  
869 <https://doi.org/10.1371/journal.pntd.0002908>.

870

- 871 [91] K.E. Mwape, I.K. Phiri, N. Praet, N. Speybroeck, J.B. Muma, P. Dorny, S. Gabriël, The  
872 Incidence of Human Cysticercosis in a Rural Community of Eastern Zambia, *PLoS Negl.*  
873 *Trop. Dis.* 7 (2013) e2142. <https://doi.org/10.1371/journal.pntd.0002142>.
- 874 [92] J.J.J. Kumwenda, G. Mateyu, S. Kampondeni, A.P. Van Dam, L. Van Lieshout, E.E.E.  
875 Zijlstra, A. van Dam, L. van Lieshout, E.E.E. Zijlstra, Differential diagnosis of stroke in a  
876 setting of high HIV prevalence in Blantyre, Malawi, *Stroke.* 17 (2005) 960–964.  
877 <https://doi.org/10.1161/01.STR.0000162585.97216.ef>.
- 878 [93] I.L. Segamwenge, N.P. Kioko, C. Mukulu, O. Jacob, W. Humphrey, J. Augustinus,  
879 Neurocysticercosis among patients with first time seizure in Northern Namibia, *Pan Afr.*  
880 *Med. J.* 24 (2016). <https://doi.org/10.11604/pamj.2016.24.127.8908>.
- 881 [94] S.H. Mabaso, D. Bhana-Nathoo, S. Lucas, An audit of CT brain findings in adults with  
882 new-onset seizures in a resource restricted setting in South Africa, *South African J.*  
883 *Radiol.* 26 (2022) 7. <https://doi.org/10.4102/SAJR.V26I1.2294>.
- 884 [95] J.C. Sousa-Figueiredo, D. Gamboa, J.M. Pedro, C. Façonny, A.J. Langa, R.J.S.  
885 Magalhães, J.R. Stothard, S.V. Nery, Epidemiology of malaria, schistosomiasis,  
886 geohelminths, anemia and malnutrition in the context of a demographic surveillance  
887 system in northern Angola, *PLoS One.* 7 (2012) e33189.  
888 <https://doi.org/10.1371/journal.pone.0033189>.
- 889 [96] D. Oliveira, F.S. Ferreira, J. Atouguia, F. Fortes, A. Guerra, S. Centeno-Lima, Infection  
890 by intestinal parasites, stunting and anemia in school-aged children from southern Angola,  
891 *PLoS One.* 10 (2015) e0137327. <https://doi.org/10.1371/journal.pone.0137327>.
- 892 [97] S.T. Mariam, B. Roma, S. Sorsa, S. Worku, L. Erosie, Assessment of sanitary and  
893 hygienic status of catering establishments of Awassa Town, *Ethiop. J. Heal. Dev.* 14  
894 (2000). <https://doi.org/10.4314/ejhd.v14i1.9934>.
- 895 [98] M. Awole, S. Gebre-Selassie, T. Kassa, G. Kibru, Prevalence of intestinal parasites in  
896 HIV-infected adult patients in Southwestern Ethiopia, *Ethiop. J. Heal. Dev.* 17 (2003).  
897 <https://doi.org/10.4314/ejhd.v17i1.9783>.
- 898 [99] Z. Mekonnen, S. Suleman, A. Biruksew, T. Tefera, L. Chelkeba, Intestinal polyparasitism  
899 with special emphasis to soil-transmitted helminths among residents around Gilgel Gibe  
900 Dam, Southwest Ethiopia: a community based survey, *BMC Public Health.* 16 (2016) 1–7.  
901 <https://doi.org/10.1186/s12889-016-3859-2>.
- 902 [100] A. Alemu, Y. Shiferaw, G. Getnet, A. Yalew, Z. Addis, Opportunistic and other intestinal  
903 parasites among HIV/AIDS patients attending Gambi higher clinic in Bahir Dar city,  
904 North West Ethiopia, *Asian Pac. J. Trop. Med.* 4 (2011) 661–665.  
905 [https://doi.org/10.1016/S1995-7645\(11\)60168-5](https://doi.org/10.1016/S1995-7645(11)60168-5).
- 906 [101] T. Wegayehu, T. Tsalla, B. Seifu, T. Teklu, Prevalence of intestinal parasitic infections  
907 among highland and lowland dwellers in Gamo area, South Ethiopia, *BMC Public Health.*  
908 13 (2013) 1–7. <https://doi.org/10.1186/1471-2458-13-151>.

- 909 [102] M. Alamir, W. Awoke, A. Feleke, Intestinal parasites infection and associated factors  
910 among school children in Dagi primary school, Amhara National Regional State, Ethiopia,  
911 Health (Irvine. Calif). 05 (2013) 1697–1701. <https://doi.org/10.4236/health.2013.510228>.
- 912 [103] S. Fekadu, K. Taye, W. Teshome, S. Asnake, Prevalence of parasitic infections in HIV-  
913 positive patients in southern Ethiopia: A cross-sectional study, J. Infect. Dev. Ctries. 7  
914 (2013) 868–872. <https://doi.org/10.3855/jidc.2906>.
- 915 [104] B. Abera, G. Alem, M. Yimer, Z. Herrador, Epidemiology of soil-transmitted helminths,  
916 Schistosoma mansoni, and haematocrit values among schoolchildren in Ethiopia, J. Infect.  
917 Dev. Ctries. 7 (2013) 253–260. <https://doi.org/10.3855/jidc.2539>.
- 918 [105] H. Mamo, Intestinal parasitic infections among prison inmates and tobacco farm workers  
919 in Shewa Robit, north-central Ethiopia, PLoS One. 9 (2014) e99559.  
920 <https://doi.org/10.1371/journal.pone.0099559>.
- 921 [106] L. Worku, D. Damte, M. Endris, H. Tesfa, M. Aemero, Schistosoma mansoni infection  
922 and associated determinant factors among school children in Sanja Town, northwest  
923 Ethiopia, J. Parasitol. Res. 2014 (2014). <https://doi.org/10.1155/2014/792536>.
- 924 [107] M. Alemayehu, W. Birhan, Y. Belyhun, M. Sahle, B. Tessema, Prevalence of smear  
925 positive tuberculosis, intestinal parasites and their co-infection among tuberculosis  
926 suspects in Gondar University Hospital and Gondar Poly Clinic, North West Ethiopia, J.  
927 Microb. Biochem. Technol. 6 (2014) 179–184. [https://doi.org/10.4172/1948-  
928 5948.1000140](https://doi.org/10.4172/1948-5948.1000140).
- 929 [108] M. Desta, D. Asrat, W. Yimtubezinash, N. Demiss, Prevalence of intestinal parasites and  
930 Salmonella and Shigella among food handlers at food service establishments in the main  
931 campus and Health Sciences College of Hawassa University, Hawassa, Ethiopia, Ethiop.  
932 J. Heal. Dev. 28 (2014) 29–34. [http://www.etpha.org/publications/the-ethiopian-journal-  
933 of-health-  
934 development.html%0Ahttp://ovidsp.ovid.com/ovidweb.cgi?T=JS&CSC=Y&NEWS=N&  
935 PAGE=fulltext&D=cagh&AN=20153041959%0Ahttp://wa4py6yj8t.search.serialssolutions  
936 .com/?url\\_ver=Z39.88-2004&rft\\_val\\_fmt= \(accessed October 18, 2021\).](http://www.etpha.org/publications/the-ethiopian-journal-of-health-development.html%0Ahttp://ovidsp.ovid.com/ovidweb.cgi?T=JS&CSC=Y&NEWS=N&PAGE=fulltext&D=cagh&AN=20153041959%0Ahttp://wa4py6yj8t.search.serialssolutions.com/?url_ver=Z39.88-2004&rft_val_fmt=)
- 937 [109] G. Beyene, H. Tasew, Prevalence of intestinal parasite, Shigella and Salmonella species  
938 among diarrheal children in Jimma health center, Jimma southwest Ethiopia: A cross  
939 sectional study, Ann. Clin. Microbiol. Antimicrob. 13 (2014) 10.  
940 <https://doi.org/10.1186/1476-0711-13-10>.
- 941 [110] A. Abossie, M. Seid, Assessment of the prevalence of intestinal parasitosis and associated  
942 risk factors among primary school children in Chencha town, Southern Ethiopia, BMC  
943 Public Health. 14 (2014). <https://doi.org/10.1186/1471-2458-14-166>.
- 944 [111] A. Gebreyesus, K. Adane, L. Negash, T. Asmelash, S. Belay, M. Alemu, M. Saravanan,  
945 Prevalence of Salmonella typhi and intestinal parasites among food handlers in Mekelle  
946 University student cafeteria, Mekelle, Ethiopia, Food Control. 44 (2014) 45–48.  
947 <https://doi.org/10.1016/j.foodcont.2014.03.040>.



- 948 [112] J.M. Ramos, N. Rodríguez-Valero, G. Tisiano, H. Fano, T. Yohannes, A. Gosa, E.  
949 Fruttero, F. Reyes, M. Górgolas, Different profile of intestinal protozoa and helminthic  
950 infections among patients with diarrhoea according to age attending a rural hospital in  
951 southern Ethiopia, *Trop. Biomed.* 31 (2014) 392–397.  
952 <https://pubmed.ncbi.nlm.nih.gov/25134911/> (accessed October 27, 2021).
- 953 [113] M.B. Shiferaw, A.D. Mengistu, Helminthiasis: Hookworm infection remains a public  
954 health problem in Dera District, South Gondar, Ethiopia, *PLoS One.* 10 (2015) e0144588.  
955 <https://doi.org/10.1371/journal.pone.0144588>.
- 956 [114] A. Bereket, T. Zewdneh, Prevalence of intestinal helminthiasis and associated risk factors  
957 among schoolchildren in Dawro Zone, Southern Ethiopia, *J. Biol. Agric. Healthc.* 5 (2015)  
958 76–82. <https://www.iiste.org/Journals/index.php/JBAH/article/view/23238> (accessed  
959 October 27, 2021).
- 960 [115] G. Tigist, E. Fantahun, E. Hailu, H. Kibe, O. Fesseha, W. Godana, W.G. Tsadik,  
961 Prevalence of Intestinal Parasitosis Among HIV / AIDS Patients Attending ART Clinic of  
962 Arbaminch Hospital., *Researchgate.Net.* (2015) 1–6.  
963 [https://www.researchgate.net/profile/Wanzahun-  
964 Godana/publication/283351146\\_PREVALENCE\\_OF\\_INTESTINAL\\_PARASITOSIS\\_A  
965 MONG\\_HIVAIDS\\_PATIENTS\\_ATTENDING\\_ART\\_CLINIC\\_OF\\_ARBAMINCH\\_HO  
966 SPITAL/links/5636572908aeb786b703f0ae/PREVALENCE-OF-INTESTINAL-  
967 PARASITOSIS-AMONG-HIV](https://www.researchgate.net/profile/Wanzahun-Godana/publication/283351146_PREVALENCE_OF_INTESTINAL_PARASITOSIS_AMONG_HIVAIDS_PATIENTS_ATTENDING_ART_CLINIC_OF_ARBAMINCH_HOSPITAL/links/5636572908aeb786b703f0ae/PREVALENCE-OF-INTESTINAL-PARASITOSIS-AMONG-HIV) (accessed October 22, 2021).
- 968 [116] M. Mama, G. Alemu, Prevalence and factors associated with intestinal parasitic infections  
969 among food handlers of Southern Ethiopia: Cross sectional study *Infectious Disease  
970 epidemiology, BMC Public Health.* 16 (2016) 1–7. [https://doi.org/10.1186/s12889-016-  
971 2790-x](https://doi.org/10.1186/s12889-016-2790-x).
- 972 [117] A. Alemu, Y. Tegegne, D. Damte, M. Melku, *Schistosoma mansoni* and soil-transmitted  
973 helminths among preschool-aged children in Chuahit, Dembia district, Northwest  
974 Ethiopia: Prevalence, intensity of infection and associated risk factors, *BMC Public  
975 Health.* 16 (2016). <https://doi.org/10.1186/s12889-016-2864-9>.
- 976 [118] A. Arota Amado, F. Wadilo Wada, F. Solomon Bisetegn, Y. Abreham Leka, Non-  
977 opportunistic intestinal parasitic infections among HIV-infected individuals at Wolaita  
978 Sodo Hospital, South Ethiopia, *J. Coast. Life Med.* 4 (2016) 353–357.  
979 <https://doi.org/10.12980/jclm.4.2016j6-57>.
- 980 [119] B. Alemayehu, Z. Tomass, F. Wadilo, D. Leja, S. Liang, B. Erko, Epidemiology of  
981 intestinal helminthiasis among school children with emphasis on *Schistosoma mansoni*  
982 infection in Wolaita zone, Southern Ethiopia, *BMC Public Health.* 17 (2017).  
983 <https://doi.org/10.1186/s12889-017-4499-x>.
- 984 [120] H. Girma, G. Beyene, Z. Mekonnen, Prevalence of intestinal parasites among food  
985 handlers at cafeteria of Jimma University Specialized Hospital, Southwest Ethiopia, *Asian  
986 Pacific J. Trop. Dis.* 7 (2017) 467–471. <https://doi.org/10.12980/apjtd.7.2017D7-20>.

- 987 [121] M. Alemu, B. Kinfе, D. Tadesse, W. Mulu, T. Hailu, E. Yizengaw, Intestinal parasitosis  
988 and anaemia among patients in a Health Center, North Ethiopia, BMC Res. Notes. 10  
989 (2017) 1–7. <https://doi.org/10.1186/s13104-017-2957-2>.
- 990 [122] D.G. Feleke, S. Arega, M. Tekleweini, K. Kindie, A. Gedefie, Schistosoma mansoni and  
991 other helminthes infections at Haike primary school children, North-East, Ethiopia: A  
992 cross-sectional study, BMC Res. Notes. 10 (2017) 1–6. <https://doi.org/10.1186/s13104-017-2942-9>.
- 994 [123] Y. Tegegne, T. Wondmagegn, L. Worku, A. Jejaw Zeleke, Prevalence of Intestinal  
995 Parasites and Associated Factors among Pulmonary Tuberculosis Suspected Patients  
996 Attending University of Gondar Hospital, Gondar, Northwest Ethiopia, J. Parasitol. Res.  
997 2018 (2018). <https://doi.org/10.1155/2018/9372145>.
- 998 [124] G. Alemu, M. Mama, Intestinal helminth co-infection and associated factors among  
999 tuberculosis patients in Arba Minch, Ethiopia, BMC Infect. Dis. 17 (2017) 1–9.  
1000 <https://doi.org/10.1186/s12879-017-2195-1>.
- 1001 [125] T. Asmare, W. Awoke, G. Alem, Prevalence of Intestinal Parasites and Associated Factors  
1002 among AdultPre-ART and ART Patients in Goncha Siso Enesie Woreda, East  
1003 Gojjam, Northwest Ethiopia, 2014, J. AIDS Clin. Res. 8 (2017).  
1004 <https://doi.org/10.4172/2155-6113.1000734>.
- 1005 [126] D. Teklemariam, M. Legesse, A. Degarege, S. Liang, B. Erko, Schistosoma mansoni and  
1006 other intestinal parasitic infections in schoolchildren and vervet monkeys in Lake Ziway  
1007 area, Ethiopia, BMC Res. Notes. 11 (2018) 1–6. <https://doi.org/10.1186/s13104-018-3248-2>.
- 1009 [127] T. Zemene, M.B. Shiferaw, Prevalence of intestinal parasitic infections in children under  
1010 the age of 5 years attending the Debre Birhan referral hospital, North Shoa, Ethiopia,  
1011 BMC Res. Notes. 11 (2018) 1–6. <https://doi.org/10.1186/s13104-018-3166-3>.
- 1012 [128] G. Alemu, Z. Aschalew, E. Zerihun, Burden of intestinal helminths and associated factors  
1013 three years after initiation of mass drug administration in Arbaminch Zuria district,  
1014 Southern Ethiopia, BMC Infect. Dis. 18 (2018). <https://doi.org/10.1186/s12879-018-3330-3>.
- 1016 [129] M. Alemu, A. Anley, K. Tedla, Magnitude of Intestinal Parasitosis and Associated Factors  
1017 in Rural School Children, Northwest Ethiopia, Ethiop. J. Health Sci. 29 (2019) 923–928.  
1018 <https://doi.org/10.4314/ejhs.v29i1.14>.
- 1019 [130] B. Sitotaw, H. Mekuriaw, D. Damtie, Prevalence of intestinal parasitic infections and  
1020 associated risk factors among Jawi primary school children, Jawi town, north-west  
1021 Ethiopia, BMC Infect. Dis. 19 (2019). <https://doi.org/10.1186/s12879-019-3971-x>.

1022

1023

- 1024 [131] E. Kebede, A. Seid, S. Akele, Prevalence and associated risk factors of intestinal parasitic  
1025 infections among asymptomatic food handlers in Wollo University student’s cafeteria,  
1026 Northeastern Ethiopia, BMC Res. Notes. 12 (2019) 1–6. [https://doi.org/10.1186/s13104-](https://doi.org/10.1186/s13104-019-4182-7)  
1027 019-4182-7.
- 1028 [132] T. Eyamo, M. Girma, T. Alemayehu, Z. Bedewi, Soil-Transmitted Helminths And Other  
1029 Intestinal Parasites Among Schoolchildren In Southern Ethiopia, Res. Rep. Trop. Med.  
1030 Volume 10 (2019) 137–143. <https://doi.org/10.2147/rrtm.s210200>.
- 1031 [133] N. Mohamed, A. Muse, M. Wordofa, D. Abera, A. Mesfin, M. Wolde, K. Desta, A.  
1032 Tsegaye, B. Taye, Increased prevalence of cestode infection associated with history of  
1033 deworming among primary school children in Ethiopia, Am. J. Trop. Med. Hyg. 101  
1034 (2019) 641–649. <https://doi.org/10.4269/ajtmh.19-0284>.
- 1035 [134] A.A. Obala, C.J. Simiyu, D.O. Odhiambo, V. Nanyu, P. Chege, R. Downing, E. Mwaliko,  
1036 A.W. Mwangi, D. Menya, D. Chelagat, H.D.N. Nyamogoba, P.O. Ayuo, W.P. O’Meara,  
1037 M. Twagirumukiza, D. Vandebroek, B.B.O. Otsyula, J. De Maeseneer, Webuye health  
1038 and demographic surveillance systems baseline survey of soil-transmitted helminths and  
1039 intestinal protozoa among children up to five years, J. Trop. Med. 2013 (2013).  
1040 <https://doi.org/10.1155/2013/734562>.
- 1041 [135] B.N. Lowoko, B. Ngugi, A. Malai, J.K. Mutai, Factors associated with intestinal parasites  
1042 among school going children in Lodwar Municipality, Turkana County, Kenya, East Afr.  
1043 Med. J. 94 (2018) 649–663. <https://doi.org/10.4314/eamj.v94i8>.
- 1044 [136] T.P.W. Jones, J.D. Hart, K. Kalua, R.L. Bailey, A prevalence survey of enteral parasites in  
1045 preschool children in the Mangochi District of Malawi, BMC Infect. Dis. 19 (2019).  
1046 <https://doi.org/10.1186/s12879-019-4439-8>.
- 1047 [137] E. V. Noormahomed, J.G. Pividal, S. Azzouz, C. Mascaró, M. Delgado-Rodríguez, A.  
1048 Osuna, Seroprevalence of anti-cysticercus antibodies among the children living in the  
1049 urban environs of Maputo, Mozambique, Ann. Trop. Med. Parasitol. 97 (2003) 31–35.  
1050 <https://doi.org/10.1179/000349803125002742>.
- 1051 [138] G. Augusto, R. Nalá, V. Casmo, A. Sabonete, L. Mapaco, J. Monteiro, Geographic  
1052 distribution and prevalence of schistosomiasis and soil-transmitted helminths among  
1053 schoolchildren in mozambique, Am. J. Trop. Med. Hyg. 81 (2009) 799–803.  
1054 <https://doi.org/10.4269/ajtmh.2009.08-0344>.
- 1055 [139] A.R.P. Walker, L.A. Dini, B.F. Walker, J.A. Frean, Helminthiasis in African children in a  
1056 relatively low risk region in south Africa: implications for treatment?, S Afr J Epidemiol  
1057 Infect South. 15 (2000). <https://www.cabdirect.org/cabdirect/abstract/20013078709>  
1058 (accessed October 22, 2021).
- 1059 [140] H. Sacolo-Gwebu, M. Chimbari, C. Kalinda, Prevalence and risk factors of  
1060 schistosomiasis and soil-transmitted helminthiasis among preschool aged children (1-5  
1061 years) in rural KwaZulu-Natal, South Africa: A cross-sectional study, Infect. Dis. Poverty.  
1062 8 (2019) 1–12. <https://doi.org/10.1186/s40249-019-0561-5>.

- 1063 [141] U.C. Braae, P. Magnussen, W. Harrison, B. Ndawi, F. Lekule, M.V. Johansen, Effect of  
1064 National Schistosomiasis Control Programme on *Taenia solium* taeniosis and porcine  
1065 cysticercosis in rural communities of Tanzania, *Parasite Epidemiol. Control.* 1 (2016)  
1066 245–251. <https://doi.org/10.1016/j.parepi.2016.08.004>.
- 1067 [142] E. Buzigi, Prevalence of Intestinal Parasites , and its Association with Severe Acute  
1068 Malnutrition Related Diarrhoea, *J. Biol. Agric. Healthc.* 5 (2015).  
1069 [https://www.researchgate.net/publication/271763982\\_Prevalence\\_of\\_Intestinal\\_Parasites\\_](https://www.researchgate.net/publication/271763982_Prevalence_of_Intestinal_Parasites_and_its_Association_with_Severe_Acute_Malnutrition_Related_Diarrhoea)  
1070 [and\\_its\\_Association\\_with\\_Severe\\_Acute\\_Malnutrition\\_Related\\_Diarrhoea](https://www.researchgate.net/publication/271763982_Prevalence_of_Intestinal_Parasites_and_its_Association_with_Severe_Acute_Malnutrition_Related_Diarrhoea) (accessed  
1071 October 18, 2021).
- 1072 [143] S. Fuhrmann, M.S. Winkler, N.B. Kabatereine, E.M. Tukahebwa, A.A. Halage, E.  
1073 Rutebemberwa, K. Medlicott, C. Schindler, J. Utzinger, G. Cissé, Risk of Intestinal  
1074 Parasitic Infections in People with Different Exposures to Wastewater and Fecal Sludge in  
1075 Kampala, Uganda: A Cross-Sectional Study, *PLoS Negl. Trop. Dis.* 10 (2016) e0004469.  
1076 <https://doi.org/10.1371/journal.pntd.0004469>.
- 1077 [144] P. Oboth, Y. Gavamukulya, B.J. Barugahare, Prevalence and clinical outcomes of  
1078 *Plasmodium falciparum* and intestinal parasitic infections among children in Kiryandongo  
1079 refugee camp, mid-Western Uganda: A cross sectional study, *BMC Infect. Dis.* 19 (2019)  
1080 1–8. <https://doi.org/10.1186/s12879-019-3939-x>.
- 1081 [145] K. Modjarrad, I. Zulu, D.T. Redden, L. Njobvu, D.O. Freedman, S.H. Vermund,  
1082 Prevalence and predictors of intestinal helminth infections among human  
1083 immunodeficiency virus type 1-infected adults in an urban African setting, *Am. J. Trop.*  
1084 *Med. Hyg.* 73 (2005) 777–782. <https://doi.org/10.4269/ajtmh.2005.73.777>.
- 1085 [146] J. Siwila, I.G.K. Phiri, H.L. Enemark, M. Nchito, A. Olsen, Intestinal helminths and  
1086 protozoa in children in pre-schools in Kafue district, Zambia, *Trans. R. Soc. Trop. Med.*  
1087 *Hyg.* 104 (2010) 122–128. <https://doi.org/10.1016/j.trstmh.2009.07.024>.

1088

1089

1090

1091

1092

1093
